# Supplementary material for: New iron(iii) complex of bis-bidentate-anchored diacyl resorcinol on a Fe3O4 nanomagnet: C–H bond oxygenation, oxidative cleavage of alkenes and benzoxazole synthesis
Source: Royal Society of Chemistry journal article supplement (doi:10.1039/d2ra06818d), 2023-01-01

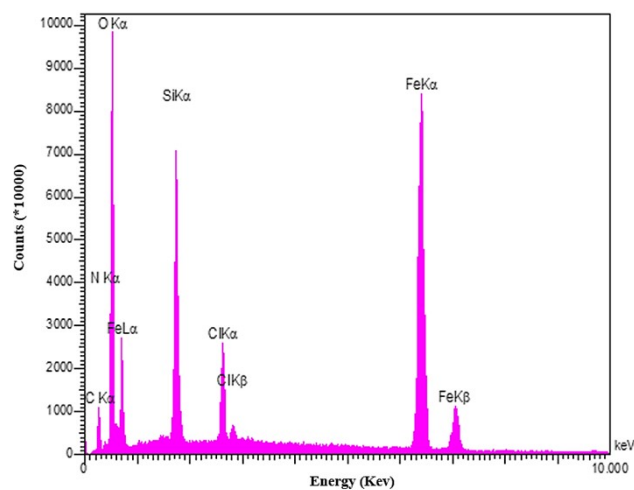

Fig. S1 Energy-dispersive X-ray spectroscopy of  $\text{Fe}_3\text{O}_4@\text{SiO}_2\text{-APTES-Fe}_2\text{LDAR}$ .

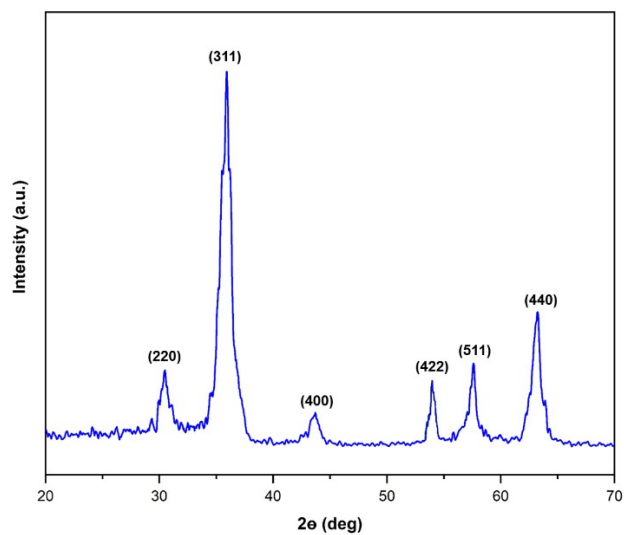

Fig. S2 XRD pattern of  $\text{Fe}_3\text{O}_4@\text{SiO}_2\text{-APTES-Fe}_2\text{LDAR}$ .

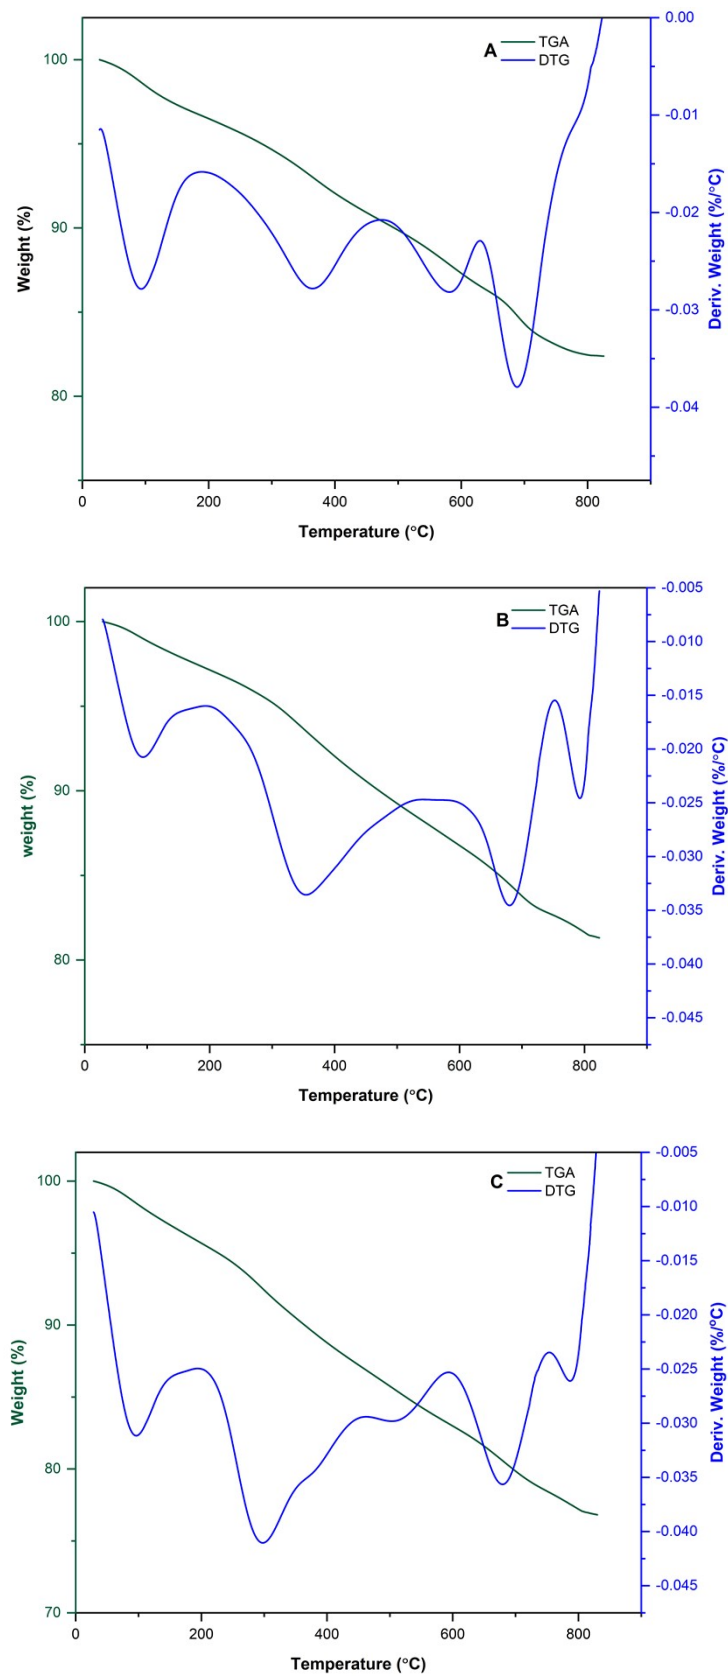

**Fig. S3** (A) TGA and DTG analyses of  $\text{Fe}_3\text{O}_4@\text{SiO}_2\text{-APTES}$ , (B)  $\text{Fe}_3\text{O}_4@\text{SiO}_2\text{-APTES-H}_2\text{L}^{\text{DAR}}$ , (C)  $\text{Fe}_3\text{O}_4@\text{SiO}_2\text{-APTES-Fe}_2\text{L}^{\text{DAR}}$ .

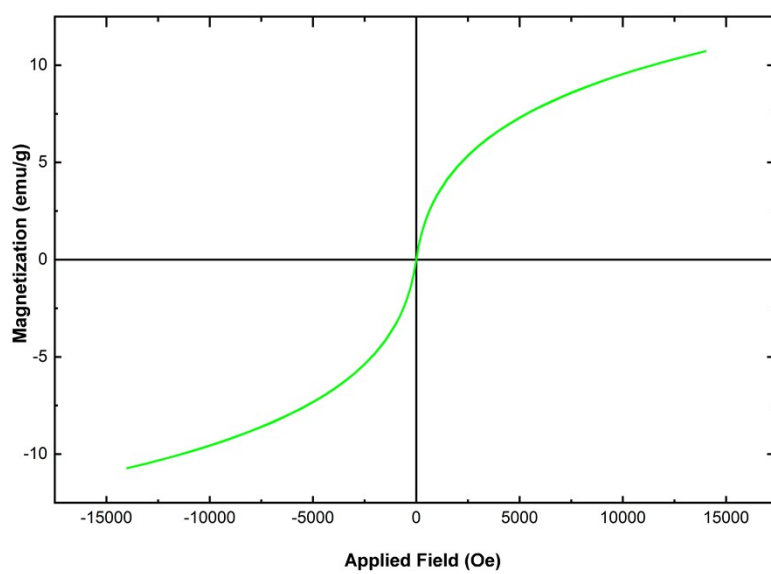

**Fig. S4** Magnetization curve of  $\text{Fe}_3\text{O}_4@\text{SiO}_2\text{-APTES-Fe}_2\text{L}^{\text{DAR}}$ .

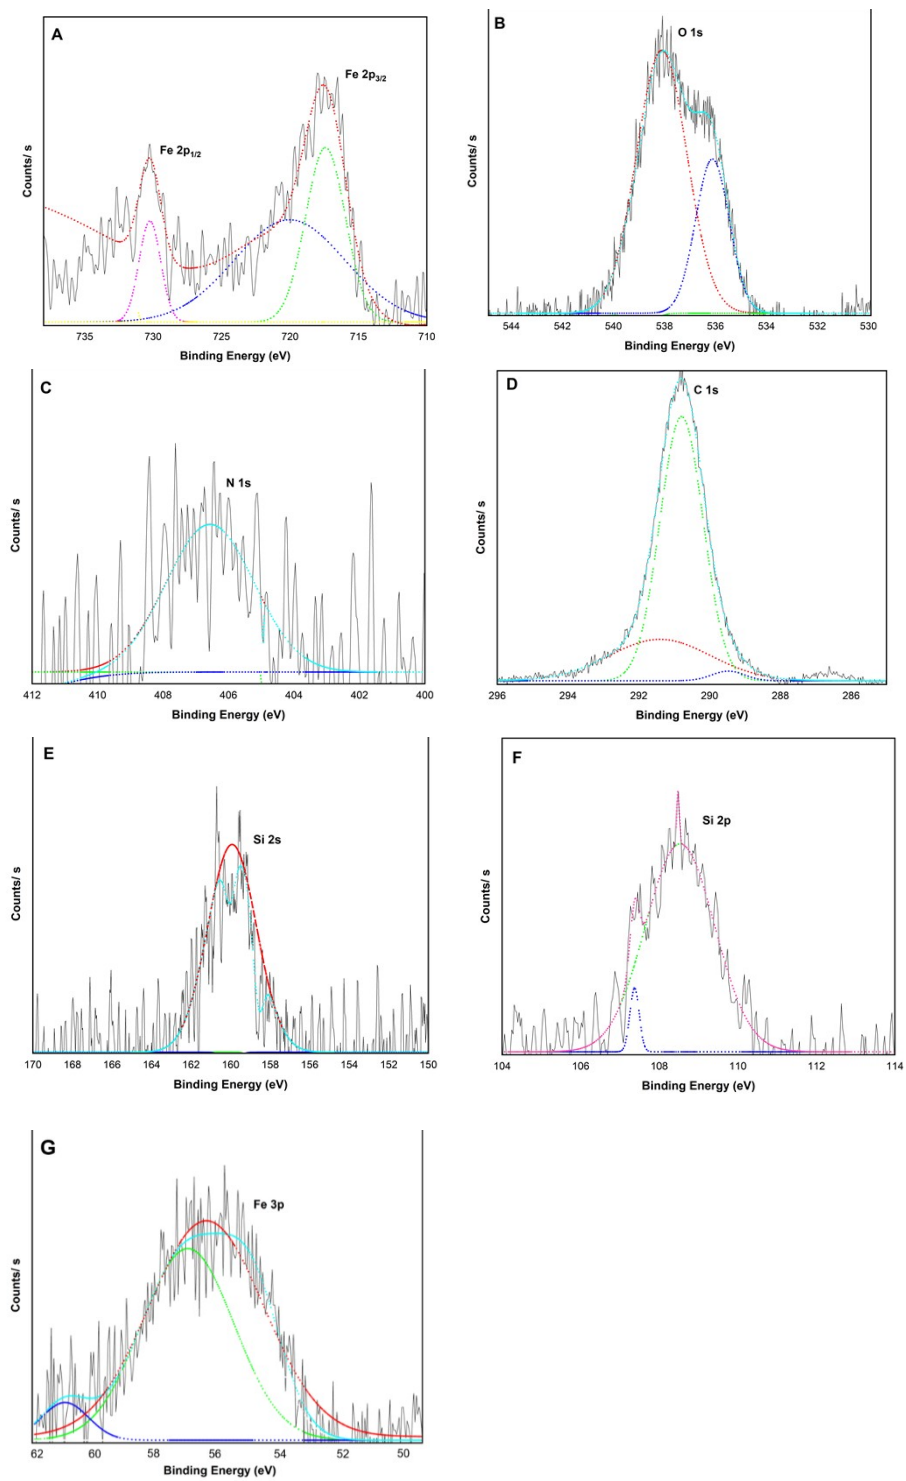

Fig. S5 The X-ray photoelectron spectroscopy (XPS) spectrum of catalyst ( $\text{Fe}_3\text{O}_4@\text{SiO}_2\text{-APTES-Fe}_2\text{L}^{\text{DAR}}$ ).

**Table S1** Optimization for the oxidation of ethylbenzene.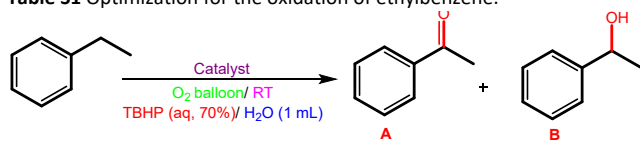

| Entry           | Catalyst [mg]     | Solvent          | O <sub>2</sub> /Ar | TBHP <sup>a</sup> | T [h] | Conv. <sup>b</sup> [%] | Sel. <sup>c</sup> [%] to A |
|-----------------|-------------------|------------------|--------------------|-------------------|-------|------------------------|----------------------------|
| 1               | 30.0 <sup>d</sup> | H <sub>2</sub> O | O <sub>2</sub>     | 2                 | 8     | 83                     | 100                        |
| 2               | 30.0 <sup>d</sup> | H <sub>2</sub> O | O <sub>2</sub>     | -                 | 2     | 6                      | 100                        |
| 3               | 30.0 <sup>d</sup> | H <sub>2</sub> O | O <sub>2</sub>     | -                 | 5     | 21                     | 100                        |
| 4               | 30.0 <sup>d</sup> | H <sub>2</sub> O | O <sub>2</sub>     | -                 | 10    | 52                     | 100                        |
| 5               | 30.0 <sup>d</sup> | H <sub>2</sub> O | O <sub>2</sub>     | -                 | 15    | 100                    | 100                        |
| 6               | 40.0 <sup>e</sup> | H <sub>2</sub> O | O <sub>2</sub>     | -                 | 15    | 100                    | 100                        |
| 7               | 40.0 <sup>e</sup> | H <sub>2</sub> O | O <sub>2</sub>     | -                 | 12    | 87                     | 100                        |
| 8               | 20.0 <sup>f</sup> | H <sub>2</sub> O | O <sub>2</sub>     | -                 | 15    | 94                     | 100                        |
| 9               | 10.0 <sup>g</sup> | H <sub>2</sub> O | O <sub>2</sub>     | -                 | 15    | 71                     | 100                        |
| 10 <sup>h</sup> | -                 | H <sub>2</sub> O | O <sub>2</sub>     | -                 | 15    | trace                  | trace                      |
| 11 <sup>i</sup> | 30.0 <sup>d</sup> | H <sub>2</sub> O | O <sub>2</sub>     | -                 | 15    | trace                  | trace                      |

Reaction conditions: Catalyst, Substrate (1 mmol), O<sub>2</sub> balloon, H<sub>2</sub>O (1 mL), T= room temperature.

[a] TBHP (70% in H<sub>2</sub>O).

[b] Conversions were determined by GC using biphenyl as an internal standard (molar ratio of substrate to internal standard is 1:1).

[c] Selectivity % = [(Product %) / (Products %)] × 100.

[d] 30.0 mg ≈ 0.9 mol% [e] 40.0 mg ≈ 1.2 mol% [f] 20.0 mg ≈ 0.6 mol% [g] 10.0 mg ≈ 0.3 mol%.

[h] In the absence of catalyst.

[i] Reference test in the presence of FeCl<sub>3</sub>.

**Table S2** Optimization for the oxidation of toluene.

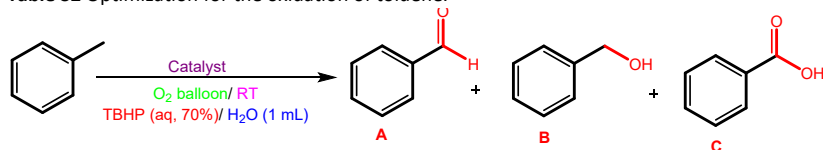

| Entry           | Catalyst type and amount[mg]                                                                   | Solvent          | O <sub>2</sub> /Ar | TBHP <sup>a</sup> | T [h] | Conv. <sup>b</sup> [%] | Sel. <sup>c</sup> [%] to C |
|-----------------|------------------------------------------------------------------------------------------------|------------------|--------------------|-------------------|-------|------------------------|----------------------------|
| 1 <sup>d</sup>  | -                                                                                              | H <sub>2</sub> O | O <sub>2</sub>     | 2                 | 20    | -                      | -                          |
| 2 <sup>e</sup>  | Fe <sub>3</sub> O <sub>4</sub> @SiO <sub>2</sub> APTESFe <sub>2</sub> L <sup>DAR</sup><br>30.0 | H <sub>2</sub> O | O <sub>2</sub>     | 2                 | 18    | 45                     | 100                        |
| 3 <sup>e</sup>  | Fe <sub>3</sub> O <sub>4</sub> @SiO <sub>2</sub> APTESFe <sub>2</sub> L <sup>DAR</sup><br>30.0 | H <sub>2</sub> O | O <sub>2</sub>     | 3                 | 18    | 72                     | 100                        |
| 4 <sup>f</sup>  | Fe <sub>3</sub> O <sub>4</sub> @SiO <sub>2</sub> APTESFe <sub>2</sub> L <sup>DAR</sup><br>40.0 | H <sub>2</sub> O | O <sub>2</sub>     | 3                 | 18    | 83                     | 100                        |
| 5 <sup>g</sup>  | Fe <sub>3</sub> O <sub>4</sub> @SiO <sub>2</sub> APTESFe <sub>2</sub> L <sup>DAR</sup><br>50.0 | H <sub>2</sub> O | O <sub>2</sub>     | 3                 | 18    | 87                     | 100                        |
| 6 <sup>f</sup>  | Fe <sub>3</sub> O <sub>4</sub> @SiO <sub>2</sub> APTESFe <sub>2</sub> L <sup>DAR</sup><br>40.0 | H <sub>2</sub> O | O <sub>2</sub>     | 3                 | 20    | 91                     | 100                        |
| 7 <sup>e</sup>  | Fe <sub>3</sub> O <sub>4</sub> @SiO <sub>2</sub> APTESFe <sub>2</sub> L <sup>DAR</sup><br>30.0 | H <sub>2</sub> O | O <sub>2</sub>     | 3                 | 20    | 82                     | 100                        |
| 8 <sup>h</sup>  | Fe <sub>3</sub> O <sub>4</sub> @SiO <sub>2</sub> APTES<br>40.0                                 | H <sub>2</sub> O | O <sub>2</sub>     | 3                 | 20    | 94                     | 1                          |
| 9 <sup>i</sup>  | Fe <sub>3</sub> O <sub>4</sub> @SiO <sub>2</sub> APTESH <sub>2</sub> L <sup>DAR</sup><br>40.0  | H <sub>2</sub> O | O <sub>2</sub>     | 3                 | 20    | 95                     | 3                          |
| 10 <sup>l</sup> | Fe <sub>3</sub> O <sub>4</sub> @SiO <sub>2</sub> APTESFe <sub>2</sub> L <sup>DAR</sup><br>40.0 | H <sub>2</sub> O | Ar                 | 3                 | 20    | 95                     | 8                          |

Reaction conditions: Catalyst, Substrate (1 mmol), O<sub>2</sub> balloon, H<sub>2</sub>O (1 mL), T = room temperature.

[a] TBHP (70% in H<sub>2</sub>O).

[b] Conversions were determined by GC using biphenyl as an internal standard (molar ratio of substrate to internal standard is 1:1).

[c] Selectivity % = [(Product %) / (Products %)] × 100.

[d] In the absence of catalyst.

[e] 30.0 mg ≈ 0.9 mol%. [f] 40.0 mg ≈ 1.2 mol%. [g] 50.0 mg ≈ 1.5 mol%.

[h] Reference test in the presence of Fe<sub>3</sub>O<sub>4</sub>@SiO<sub>2</sub>APTES.

[i] Reference test in the presence of Fe<sub>3</sub>O<sub>4</sub>@SiO<sub>2</sub>APTESH<sub>2</sub>L<sup>DAR</sup>.

[l] Reference test in the absence of O<sub>2</sub> balloon (under Ar atmosphere)

**Table S3** Optimization for the oxidation of 1-hexene.

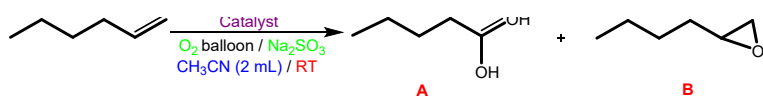

| Entry           | Catalyst type and amount [mg]                                                                    | Solvent                  | O <sub>2</sub> /Ar | Na <sub>2</sub> SO <sub>3</sub> <sup>a</sup> [mmol] | T [h] | Conv. <sup>b</sup> [%] | Sel. <sup>c</sup> [%] to A |
|-----------------|--------------------------------------------------------------------------------------------------|--------------------------|--------------------|-----------------------------------------------------|-------|------------------------|----------------------------|
| 1 <sup>d</sup>  | -                                                                                                | CH <sub>3</sub> CN       | O <sub>2</sub>     | 2                                                   | 15    | -                      | -                          |
| 2 <sup>e</sup>  | Fe <sub>3</sub> O <sub>4</sub> @SiO <sub>2</sub> /APTES/Fe <sub>2</sub> L <sup>DAR</sup><br>30.0 | CH <sub>3</sub> CN       | O <sub>2</sub>     | 2                                                   | 15    | 48                     | 100                        |
| 3 <sup>f</sup>  | Fe <sub>3</sub> O <sub>4</sub> @SiO <sub>2</sub> /APTES/Fe <sub>2</sub> L <sup>DAR</sup><br>40.0 | CH <sub>3</sub> CN       | O <sub>2</sub>     | 2                                                   | 15    | 72                     | 100                        |
| 4 <sup>g</sup>  | Fe <sub>3</sub> O <sub>4</sub> @SiO <sub>2</sub> /APTES/Fe <sub>2</sub> L <sup>DAR</sup><br>50.0 | CH <sub>3</sub> CN       | O <sub>2</sub>     | 2                                                   | 15    | 94                     | 100                        |
| 5 <sup>g</sup>  | Fe <sub>3</sub> O <sub>4</sub> @SiO <sub>2</sub> /APTES/Fe <sub>2</sub> L <sup>DAR</sup><br>50.0 | CH <sub>3</sub> CN       | O <sub>2</sub>     | 2                                                   | 10    | 57                     | 100                        |
| 6 <sup>g</sup>  | Fe <sub>3</sub> O <sub>4</sub> @SiO <sub>2</sub> /APTES/Fe <sub>2</sub> L <sup>DAR</sup><br>50.0 | CH <sub>3</sub> CN       | O <sub>2</sub>     | 1                                                   | 15    | 67                     | 100                        |
| 7 <sup>g</sup>  | Fe <sub>3</sub> O <sub>4</sub> @SiO <sub>2</sub> /APTES/Fe <sub>2</sub> L <sup>DAR</sup><br>50.0 | CH <sub>3</sub> CN       | O <sub>2</sub>     | 3                                                   | 15    | 90                     | 100                        |
| 8 <sup>g</sup>  | Fe <sub>3</sub> O <sub>4</sub> @SiO <sub>2</sub> /APTES/Fe <sub>2</sub> L <sup>DAR</sup><br>50.0 | CH <sub>3</sub> CN       | O <sub>2</sub>     | -                                                   | 15    | 24                     | 100                        |
| 9 <sup>g</sup>  | Fe <sub>3</sub> O <sub>4</sub> @SiO <sub>2</sub> /APTES/Fe <sub>2</sub> L <sup>DAR</sup><br>50.0 | Solvent free             | O <sub>2</sub>     | 2                                                   | 15    | -                      | -                          |
| 10 <sup>g</sup> | Fe <sub>3</sub> O <sub>4</sub> @SiO <sub>2</sub> /APTES/Fe <sub>2</sub> L <sup>DAR</sup><br>50.0 | H <sub>2</sub> O/acetone | O <sub>2</sub>     | 2                                                   | 15    | 84                     | 100                        |
| 11 <sup>h</sup> | Fe <sub>3</sub> O <sub>4</sub> @SiO <sub>2</sub> /APTES<br>50.0                                  | CH <sub>3</sub> CN       | O <sub>2</sub>     | 2                                                   | 15    | -                      | -                          |
| 12 <sup>i</sup> | Fe <sub>3</sub> O <sub>4</sub> @SiO <sub>2</sub> /APTES/H <sub>2</sub> L <sup>DAR</sup><br>50.0  | CH <sub>3</sub> CN       | O <sub>2</sub>     | 2                                                   | 15    | -                      | -                          |
| 13 <sup>l</sup> | Fe <sub>3</sub> O <sub>4</sub> @SiO <sub>2</sub> /APTES/Fe <sub>2</sub> L <sup>DAR</sup><br>50.0 | CH <sub>3</sub> CN       | Ar                 | 2                                                   | 15    | 74                     | 100                        |
| 14 <sup>m</sup> | FeCl <sub>3</sub><br>50.0                                                                        | CH <sub>3</sub> CN       | O <sub>2</sub>     | 2                                                   | 15    | -                      | -                          |

Reaction conditions: Catalyst, Substrate (2 mmol), O<sub>2</sub> balloon, CH<sub>3</sub>CN (2 mL), T = room temperature.

[a] Na<sub>2</sub>SO<sub>3</sub> (2 mmol, 0.24 g).

[b] Isolated yield.

[c] Selectivity % = [(Product %) / (Products %)] × 100.

[d] In the absence of catalyst.

[e] 30.0 mg ≈ 0.9 mol%. [f] 40.0 mg ≈ 1.2 mol%. [g] 50.0 mg ≈ 1.5 mol%.

[h] Reference test in the presence of Fe<sub>3</sub>O<sub>4</sub>@SiO<sub>2</sub>/APTES.

[i] Reference test in the presence of Fe<sub>3</sub>O<sub>4</sub>@SiO<sub>2</sub>/APTES/H<sub>2</sub>L<sup>DAR</sup>.

[l] Reference test in the absence of O<sub>2</sub> balloon (under Ar atmosphere).

[m] Reference test in the presence of FeCl<sub>3</sub>.

**Table S4** Optimization for the oxidation of cyclohexene.

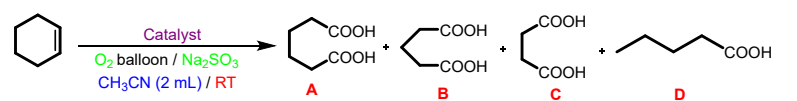

| Entry          | Catalyst [mg]     | Solvent                  | O <sub>2</sub> /Ar | Na <sub>2</sub> SO <sub>3</sub> <sup>a</sup> | T [h] | Yield <sup>b</sup> [%] |
|----------------|-------------------|--------------------------|--------------------|----------------------------------------------|-------|------------------------|
| 1 <sup>f</sup> | -                 | CH <sub>3</sub> CN       | O <sub>2</sub>     | 2                                            | 24    | -                      |
| 2              | 30.0 <sup>c</sup> | CH <sub>3</sub> CN       | O <sub>2</sub>     | 2                                            | 24    | 57                     |
| 3              | 40.0 <sup>d</sup> | CH <sub>3</sub> CN       | O <sub>2</sub>     | 2                                            | 24    | 78                     |
| 4              | 50.0 <sup>e</sup> | CH <sub>3</sub> CN       | O <sub>2</sub>     | 2                                            | 24    | 87                     |
| 5              | 50.0 <sup>e</sup> | CH <sub>3</sub> CN       | O <sub>2</sub>     | 2                                            | 15    | 65                     |
| 6              | 50.0 <sup>e</sup> | CH <sub>3</sub> CN       | O <sub>2</sub>     | 1                                            | 24    | 58                     |
| 7              | 50.0 <sup>e</sup> | CH <sub>3</sub> CN       | O <sub>2</sub>     | -                                            | 24    | -                      |
| 8              | 50.0 <sup>e</sup> | H <sub>2</sub> O/acetone | O <sub>2</sub>     | 2                                            | 24    | 80                     |
| 9              | 50.0 <sup>e</sup> | Toluene                  | O <sub>2</sub>     | 2                                            | 24    | -                      |
| 10             | 50.0 <sup>e</sup> | CHCl <sub>3</sub>        | O <sub>2</sub>     | 2                                            | 24    | -                      |
| 11             | 30.0 <sup>c</sup> | Solvent free             | O <sub>2</sub>     | 2                                            | 24    | -                      |

Reaction conditions: Catalyst, Substrate (2 mmol), O<sub>2</sub> balloon, CH<sub>3</sub>CN (2 mL), T= room temperature.

[a] Na<sub>2</sub>SO<sub>3</sub> (2 mmol, 0.24 g).

[b] Isolated yield.

[c] 30.0 mg ≈ 0.9 mol% [d] 40.0 mg ≈ 1.2 mol% [e] 50.0 mg ≈ 1.5 mol%.

[f] In the absence of catalyst.



**Table S5** Optimization of the reaction conditions for synthesis of 7, 5,7-Di-tert-butyl-2-(4-bromophenyl)benzo[d]oxazole.

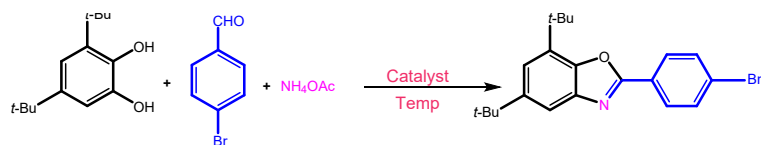

| Entry           | Catalyst/mol %                                                                               | solvent          | temp. | time (h) | Yield <sup>a</sup> (%) |
|-----------------|----------------------------------------------------------------------------------------------|------------------|-------|----------|------------------------|
| 1 <sup>c</sup>  | Fe <sub>3</sub> O <sub>4</sub> @SiO <sub>2</sub> -APTESFe <sub>2</sub> L <sup>DAR</sup> /1.2 | Solvent free     | 25    | 24       | -                      |
| 2 <sup>c</sup>  | Fe <sub>3</sub> O <sub>4</sub> @SiO <sub>2</sub> -APTESFe <sub>2</sub> L <sup>DAR</sup> /1.2 | Solvent free     | 70    | 24       | 18                     |
| 3 <sup>c</sup>  | Fe <sub>3</sub> O <sub>4</sub> @SiO <sub>2</sub> -APTESFe <sub>2</sub> L <sup>DAR</sup> /1.2 | H <sub>2</sub> O | 25    | 24       | 36                     |
| 4 <sup>c</sup>  | Fe <sub>3</sub> O <sub>4</sub> @SiO <sub>2</sub> -APTESFe <sub>2</sub> L <sup>DAR</sup> /1.2 | H <sub>2</sub> O | 70    | 24       | 97                     |
| 5 <sup>c</sup>  | Fe <sub>3</sub> O <sub>4</sub> @SiO <sub>2</sub> -APTESFe <sub>2</sub> L <sup>DAR</sup> /1.2 | H <sub>2</sub> O | 70    | 10       | 97                     |
| 6 <sup>c</sup>  | Fe <sub>3</sub> O <sub>4</sub> @SiO <sub>2</sub> -APTESFe <sub>2</sub> L <sup>DAR</sup> /1.2 | H <sub>2</sub> O | 70    | 7        | 75                     |
| 7 <sup>b</sup>  | Fe <sub>3</sub> O <sub>4</sub> @SiO <sub>2</sub> -APTESFe <sub>2</sub> L <sup>DAR</sup> /0.9 | H <sub>2</sub> O | 70    | 10       | 79                     |
| 8 <sup>d</sup>  | Fe <sub>3</sub> O <sub>4</sub> @SiO <sub>2</sub> -APTESFe <sub>2</sub> L <sup>DAR</sup> /1.5 | H <sub>2</sub> O | 70    | 10       | 95                     |
| 9 <sup>d</sup>  | Fe <sub>3</sub> O <sub>4</sub> @SiO <sub>2</sub> -APTESFe <sub>2</sub> L <sup>DAR</sup> /1.5 | H <sub>2</sub> O | 70    | 7        | 71                     |
| 10 <sup>e</sup> | Fe <sub>3</sub> O <sub>4</sub> @SiO <sub>2</sub> -APTESFe <sub>2</sub> L <sup>DAR</sup> /1.2 | H <sub>2</sub> O | 70    | 10       | 84                     |
| 11 <sup>f</sup> | Fe <sub>3</sub> O <sub>4</sub> @SiO <sub>2</sub> -APTESFe <sub>2</sub> L <sup>DAR</sup> /1.2 | H <sub>2</sub> O | 70    | 10       | 77                     |
| 12 <sup>g</sup> | Fe <sub>3</sub> O <sub>4</sub> @SiO <sub>2</sub> -APTESH <sub>2</sub> L <sup>DAR</sup> /1.2  | H <sub>2</sub> O | 70    | 10       | 17                     |
| 13 <sup>h</sup> | Fe <sub>3</sub> O <sub>4</sub> @SiO <sub>2</sub> -APTES/1.2                                  | H <sub>2</sub> O | 70    | 10       | 8                      |
| 14 <sup>i</sup> | FeCl <sub>3</sub> /1.2                                                                       | H <sub>2</sub> O | 70    | 10       | -                      |
| 15              | -                                                                                            | H <sub>2</sub> O | 70    | 10       | -                      |

Reaction conditions: Catalyst, 3,5-di-tert-butylbenzene-1,2-diol (0.5 mmol), NH<sub>4</sub>OAc (0.5 mmol) and 4-bromobenzaldehyde (0.5 mmol), H<sub>2</sub>O (7 mL).

[a] Isolated yield.

[b] 30.0 mg ≈ 0.9 mol% [c] 40.0 mg ≈ 1.2 mol% [d] 50.0 mg ≈ 1.5 mol%.

[e] NH<sub>4</sub>OAc (1 mmol) [f] NH<sub>4</sub>OAc (2 mmol).

[g] Reference test in the presence of Fe<sub>3</sub>O<sub>4</sub>@SiO<sub>2</sub>-APTES-H<sub>2</sub>L<sup>DAR</sup>.

[h] Reference test in the presence of Fe<sub>3</sub>O<sub>4</sub>@SiO<sub>2</sub>-APTES.

[i] Reference test in the presence of FeCl<sub>3</sub>.

# $^1\text{H}$ NMR spectra for all synthesized compounds

## C-H bond oxidation

### 1. Acetophenone

$^1\text{H}$  NMR (250 MHz,  $\text{CDCl}_3$ ):  $\delta$  (ppm) = 7.96-7.94 (m, 2H), 7.56-7.43 (m, 3H), 2.5 (s, 3H).

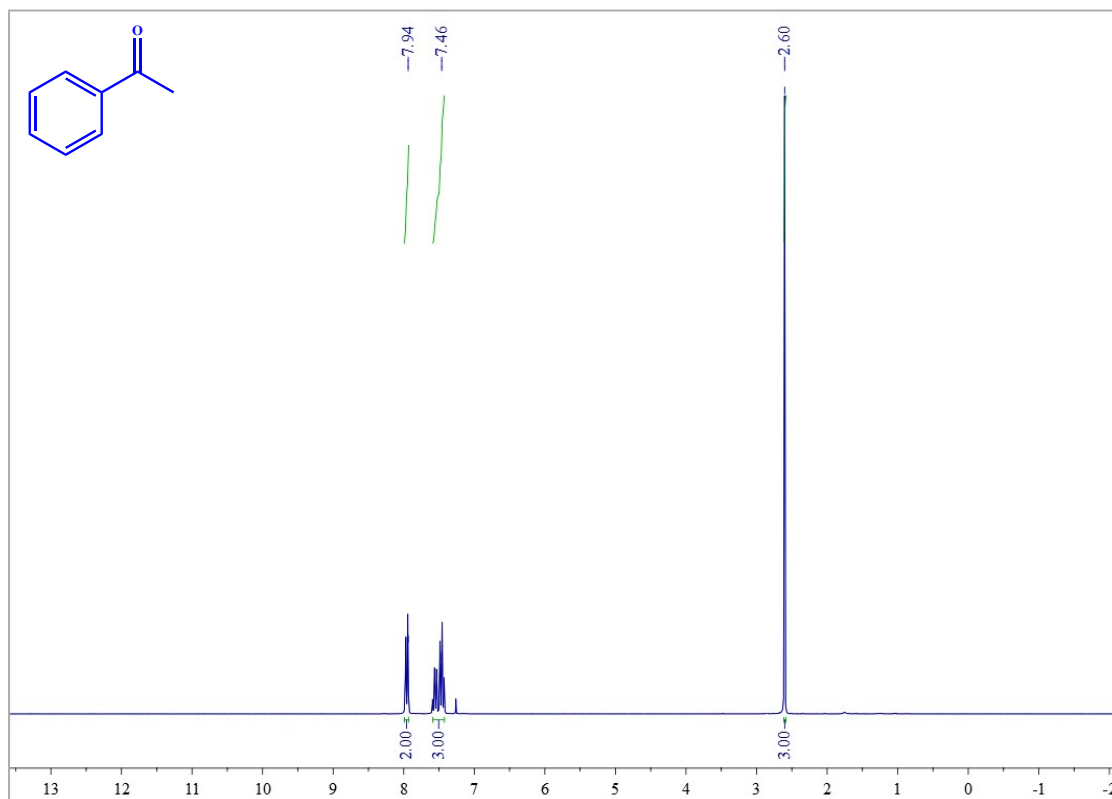

## 2. Benzoic acid

$^1\text{H NMR}$  (250 MHz,  $\text{CDCl}_3$ ):  $\delta$  (ppm) = 8.1 (d,  $J$ = 8 Hz, 2H), 7.62 (t,  $J$ = 8 Hz, 1H), 7.48 (t,  $J$ = 8 Hz, 2H).

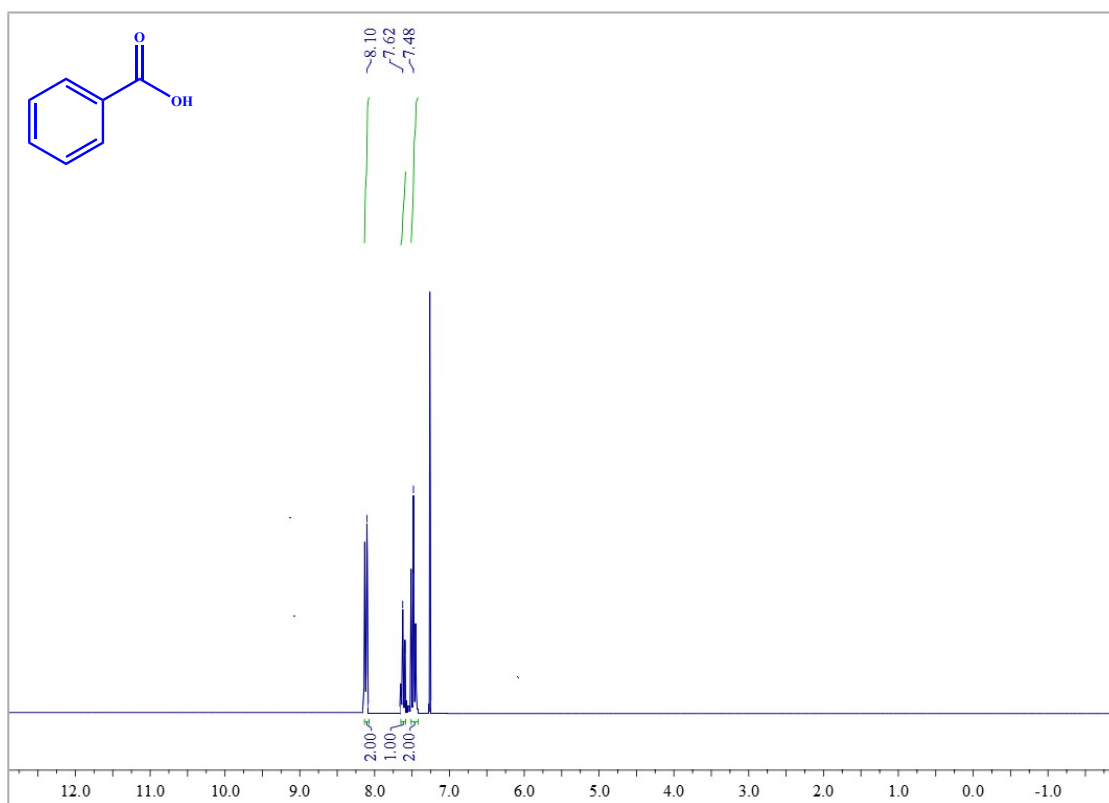

### 3. 4-Bromobenzaldehyde

$^1\text{H NMR}$  (250 MHz,  $\text{CDCl}_3$ ):  $\delta$  (ppm) = 9.98 (s, 1H), 7.73-7.64 (m, 4H).

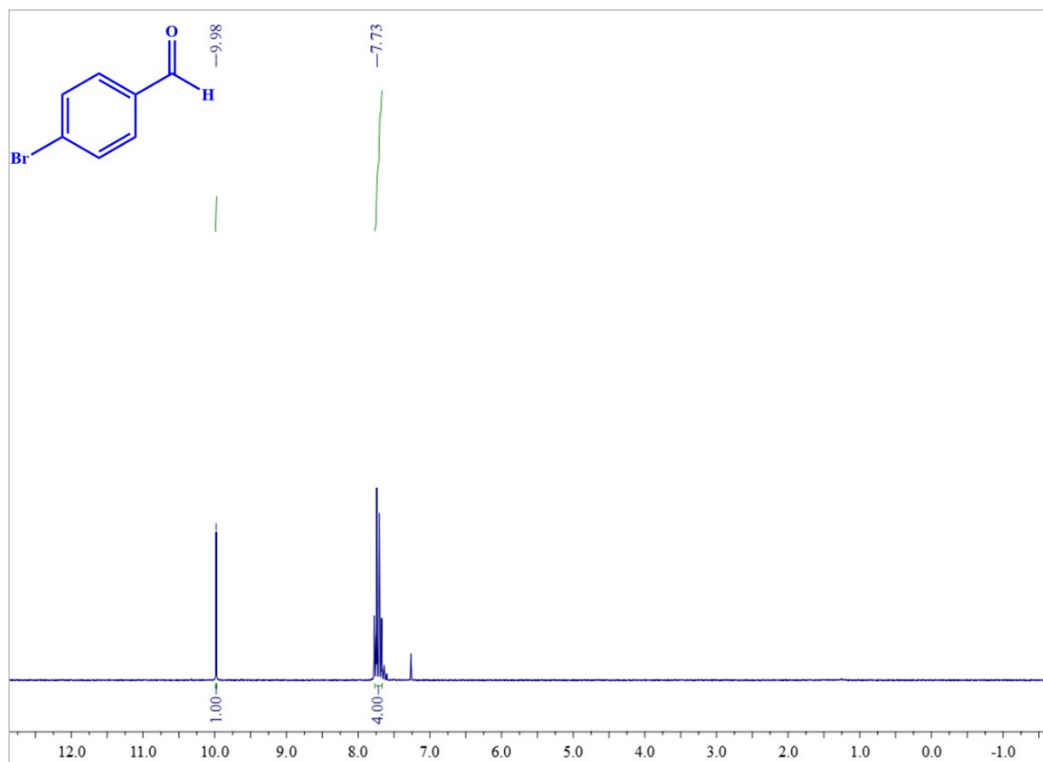

#### 4. 4-Nitrobenzaldehyde

$^1\text{H NMR}$  (250 MHz,  $\text{CDCl}_3$ ):  $\delta$  (ppm) = 10.16 (s, 1H), 8.41-8.38 (d, d,  $J$  = 8 Hz, 2H), 8.10-8.06 (d,  $J$  = 8 Hz, 2H).

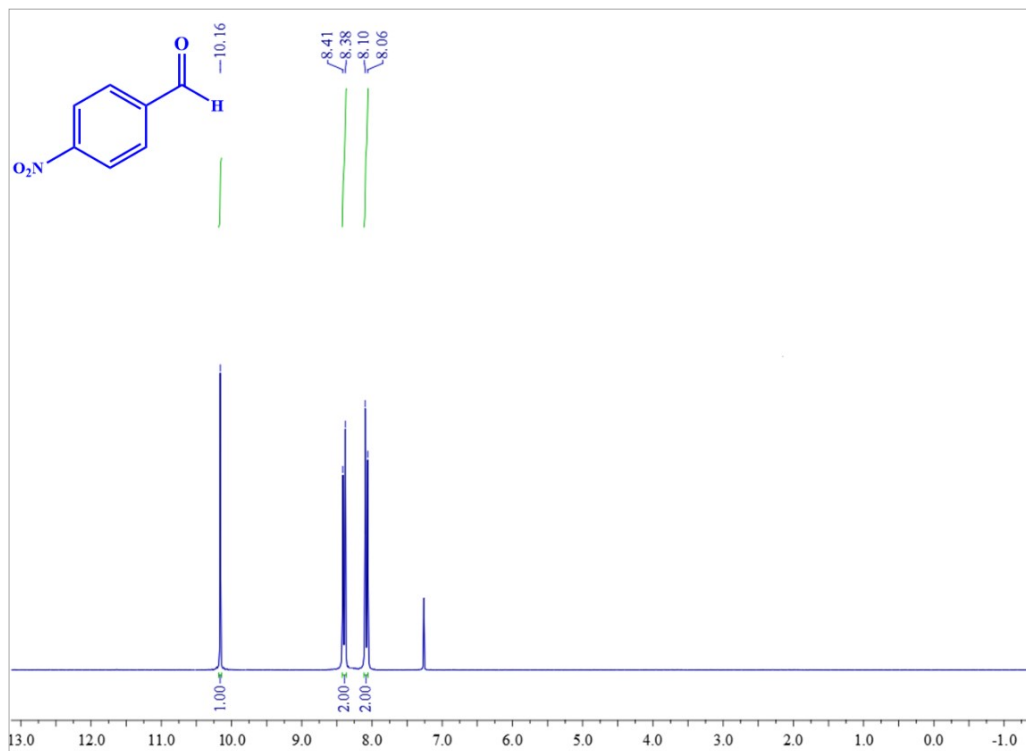

#### 5. 4-Chlorobenzoic acid

$^1\text{H NMR}$  (250 MHz,  $d_6$ -DMSO):  $\delta$  (ppm) = 7.91 (d,  $J$  = 8 Hz, 2H), 7.57 (d,  $J$  = 8 Hz, 2H).

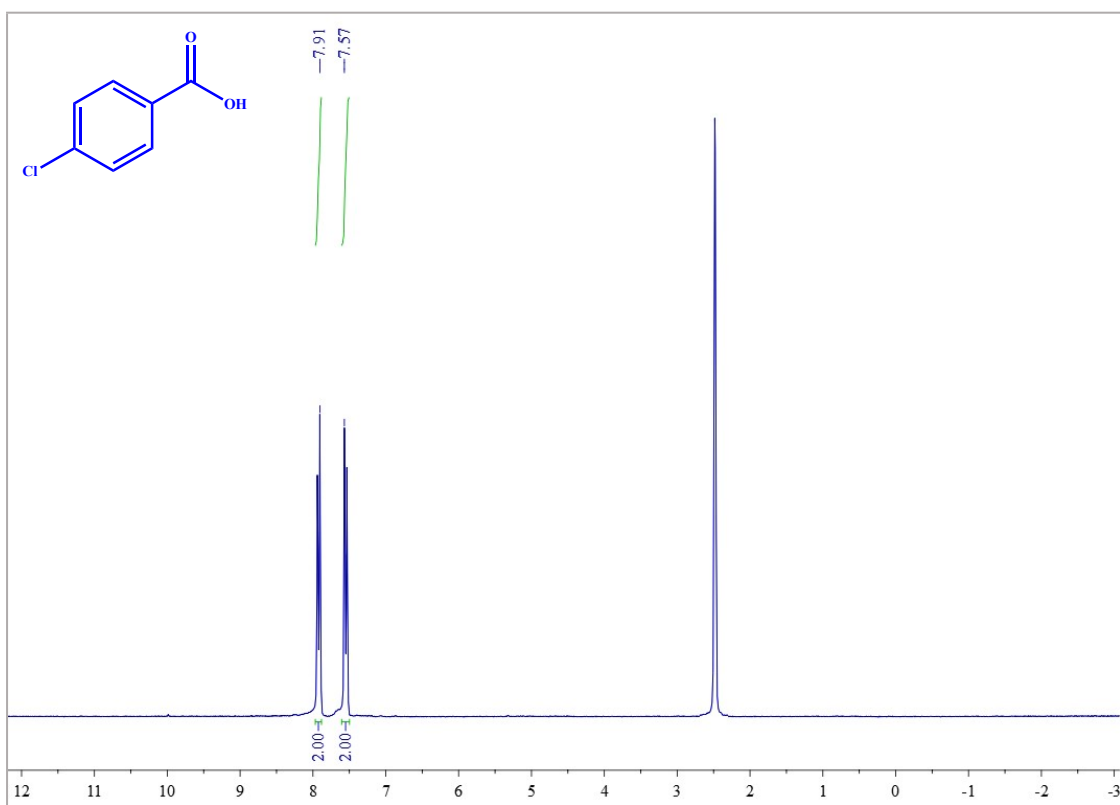

6. 4-Methylbenzoic acid

$^1\text{H NMR}$  (250 MHz,  $\text{CDCl}_3$ ):  $\delta$  (ppm) = 7.99 (d,  $J$  = 8 Hz, 2H), 7.629 (d,  $J$  = 8 Hz, 2H), 2.43 (s, 3H).

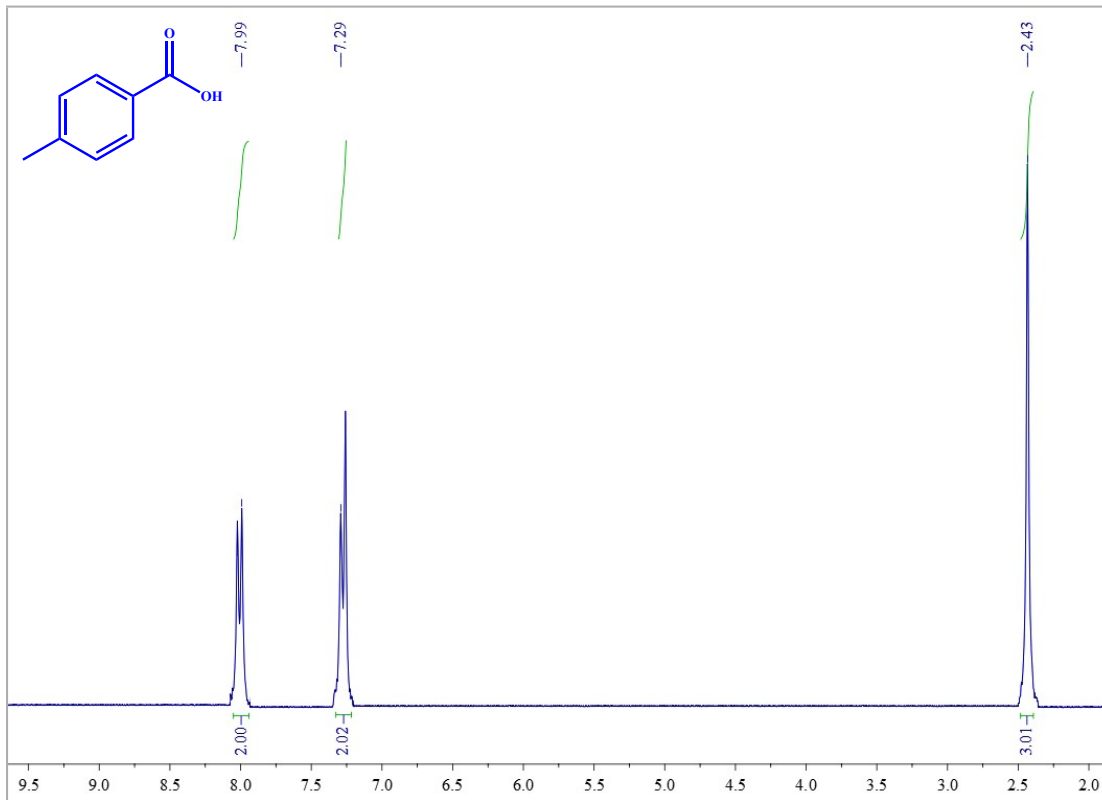

7. 3-Methylbenzoic acid

$^1\text{H NMR}$  (250 MHz,  $\text{CDCl}_3$ ):  $\delta$  (ppm) = 7.93 (d,  $J$  = 8 Hz, 2H), 7.39 (m, 2H), 2.43 (s, 3H).

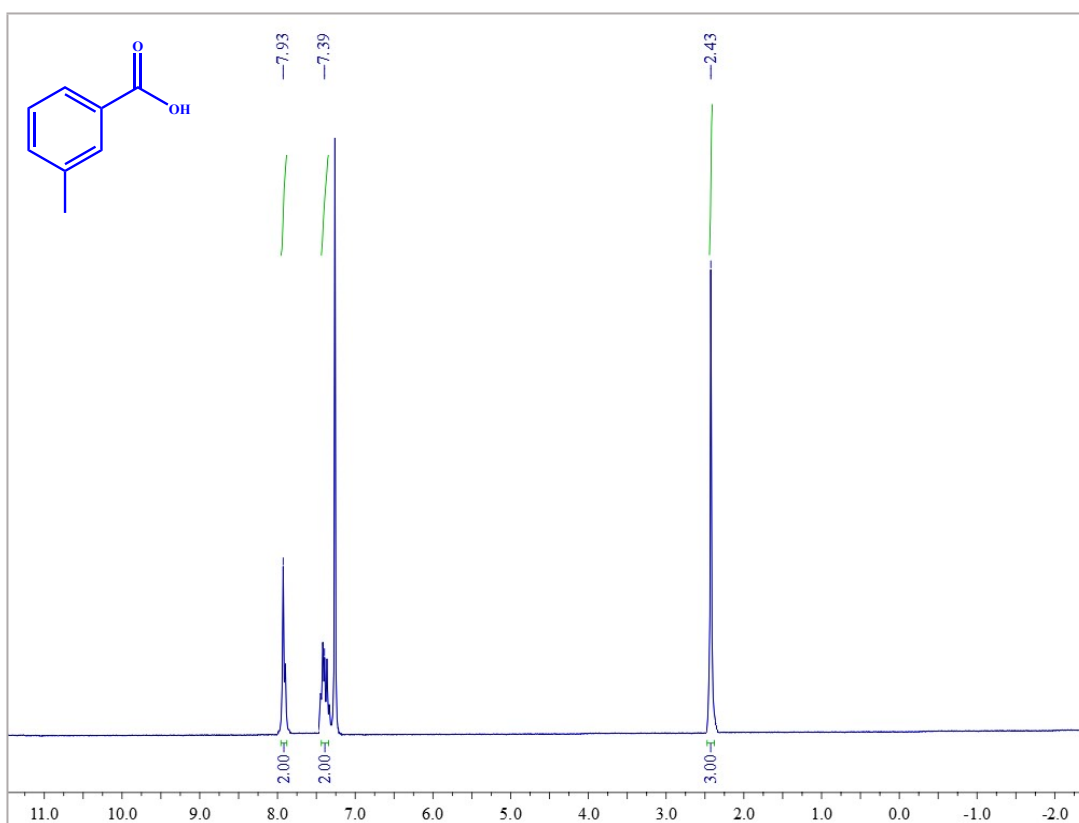

### 8. 2-Methylbenzoic acid

$^1\text{H NMR}$  (250 MHz,  $\text{CDCl}_3$ ):  $\delta$  (ppm) = 8 (d,  $J$  = 8 Hz, 1H), 7.39-7.22 (m, 3H), 2.59 (s, 3H).

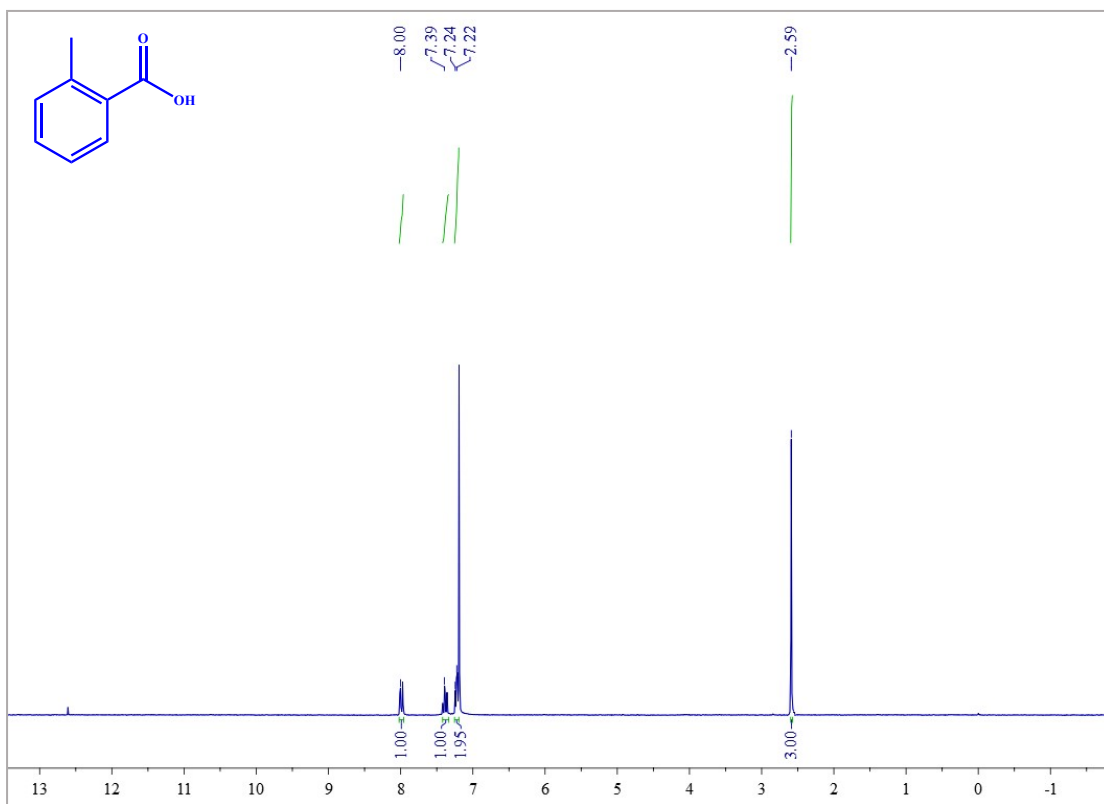

### 9. Benzophenone

$^1\text{H NMR}$  (250 MHz,  $\text{CDCl}_3$ ):  $\delta$  (ppm) = 7.80 (m, 2H), 7.60-7.49 (m, 3H).

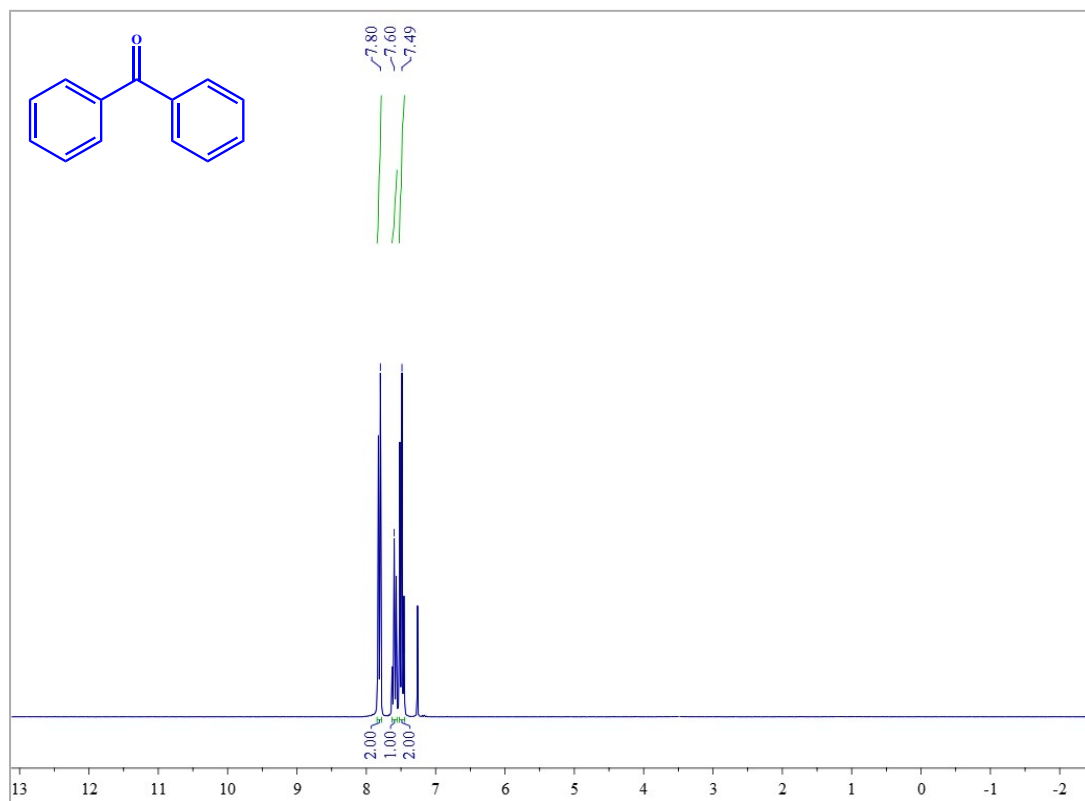

### 10. 1-Tetralone

$^1\text{H NMR}$  (250 MHz,  $\text{CDCl}_3$ ):  $\delta$  (ppm) = 7.99 (d,  $J$  = 8 Hz, 1H), 7.42 (m, 1H), 7.31 (m, 2H), 2.94 (m, 2H), 2.61 (m, 2H), 2.11 (m, 2H).

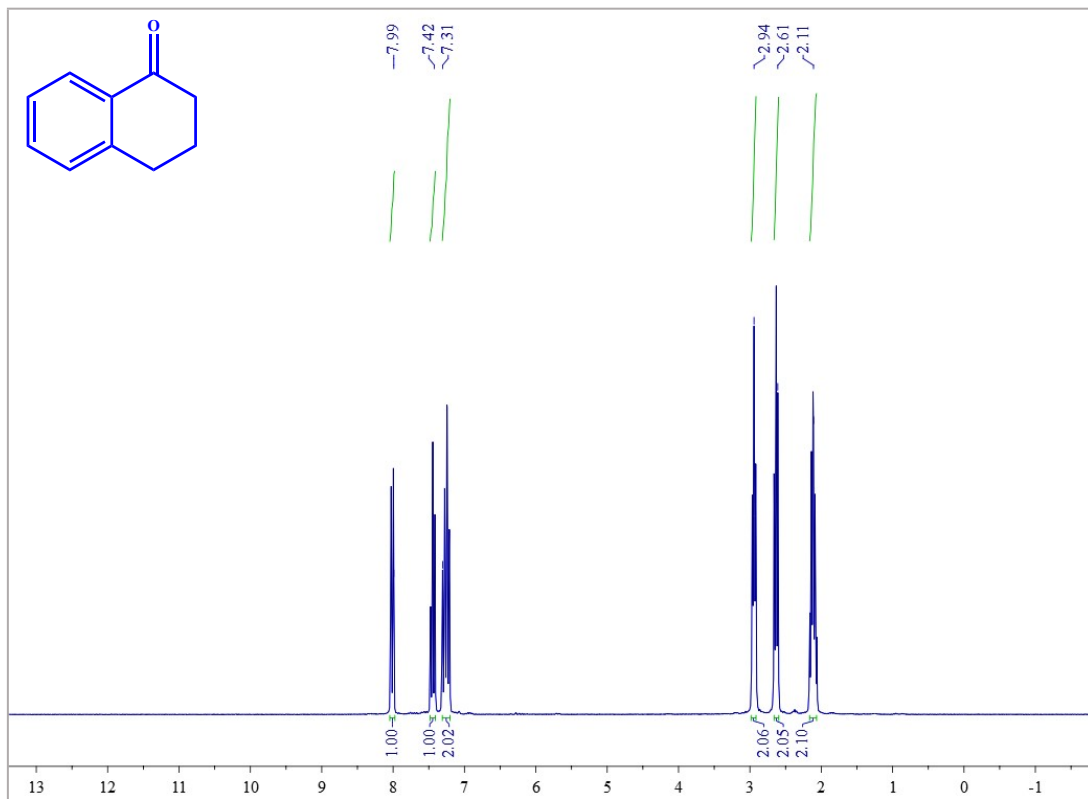

### 11. Cyclohexanol

$^1\text{H NMR}$  (250 MHz,  $\text{CDCl}_3$ ):  $\delta$  (ppm) = 3.55 (m, 1H), 2.22 (s, 1H), 1.18-1.55 (m, 10H).

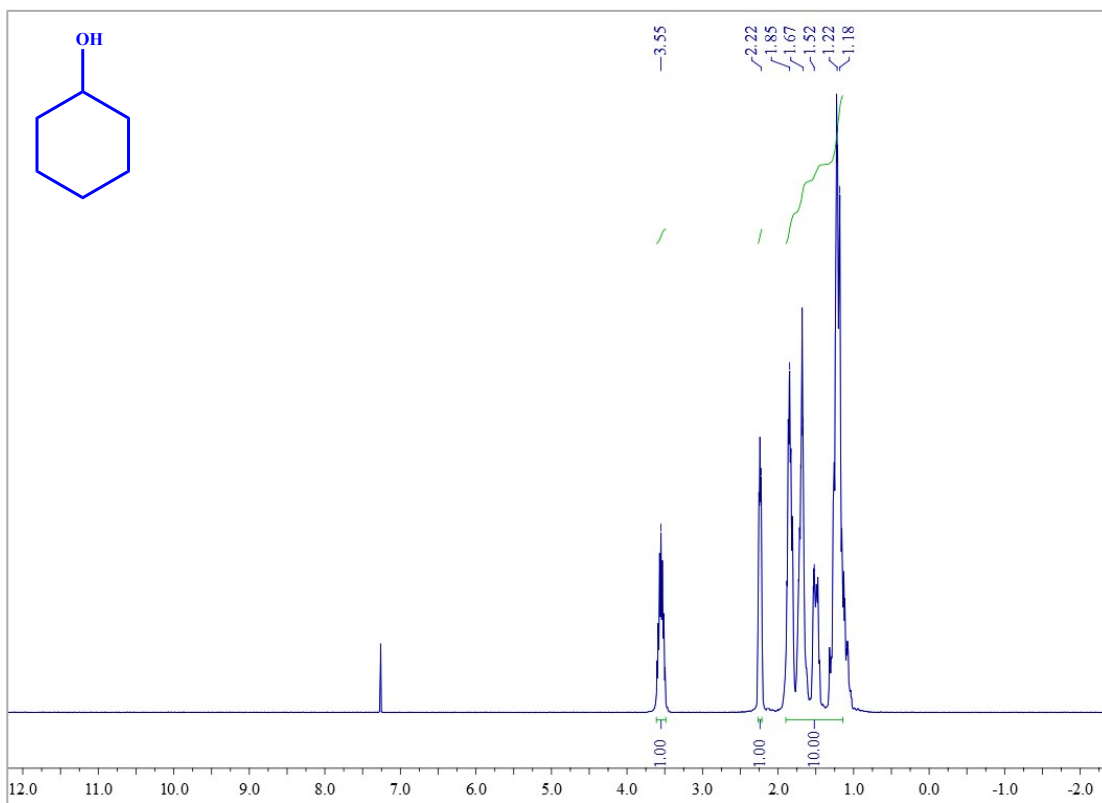



## C=C bond oxidation

### 1. 1-Pentanoic acid

$^1\text{H NMR}$  (250 MHz,  $\text{CDCl}_3$ ):  $\delta$  (ppm) = 2.64 (m, 2H), 1.57 (m, 2H), 1.26 (m, 2H), 0.88 (m, 3H).

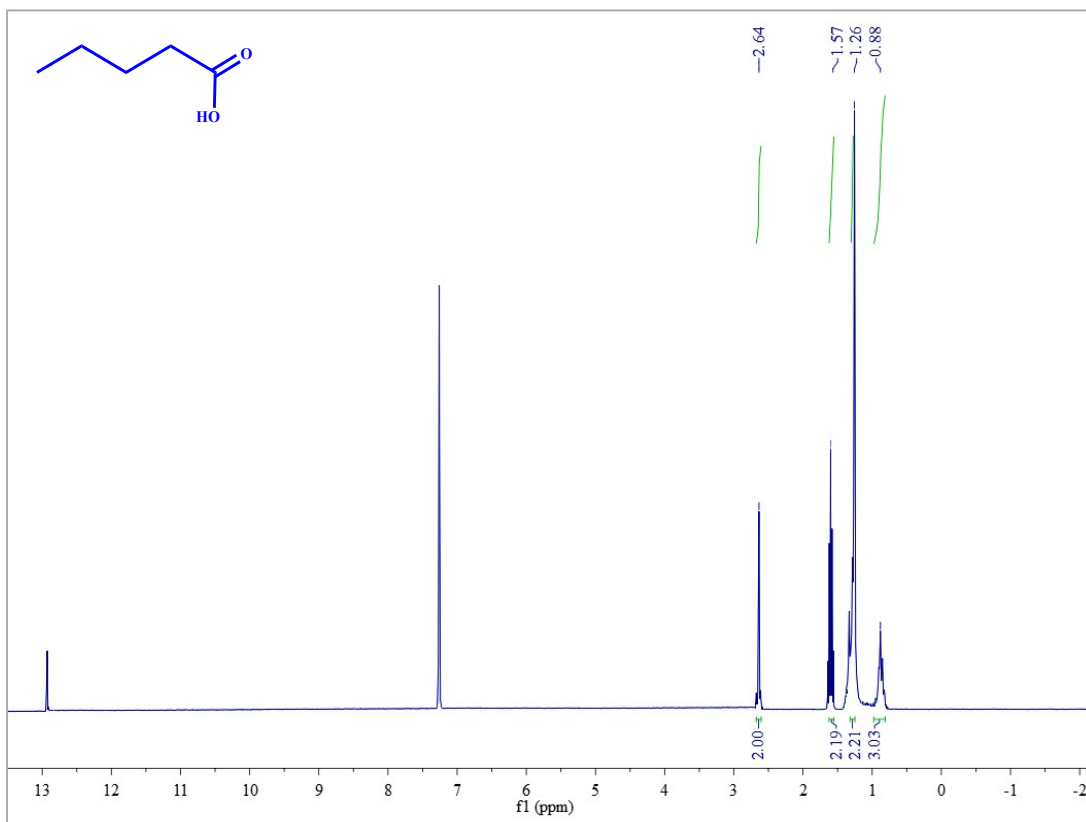

### 2. Adipic acid

$^1\text{H NMR}$  (250 MHz,  $\text{CDCl}_3$ ):  $\delta$  (ppm) = 2.17 (m, 4H), 1.48 (m, 4H).

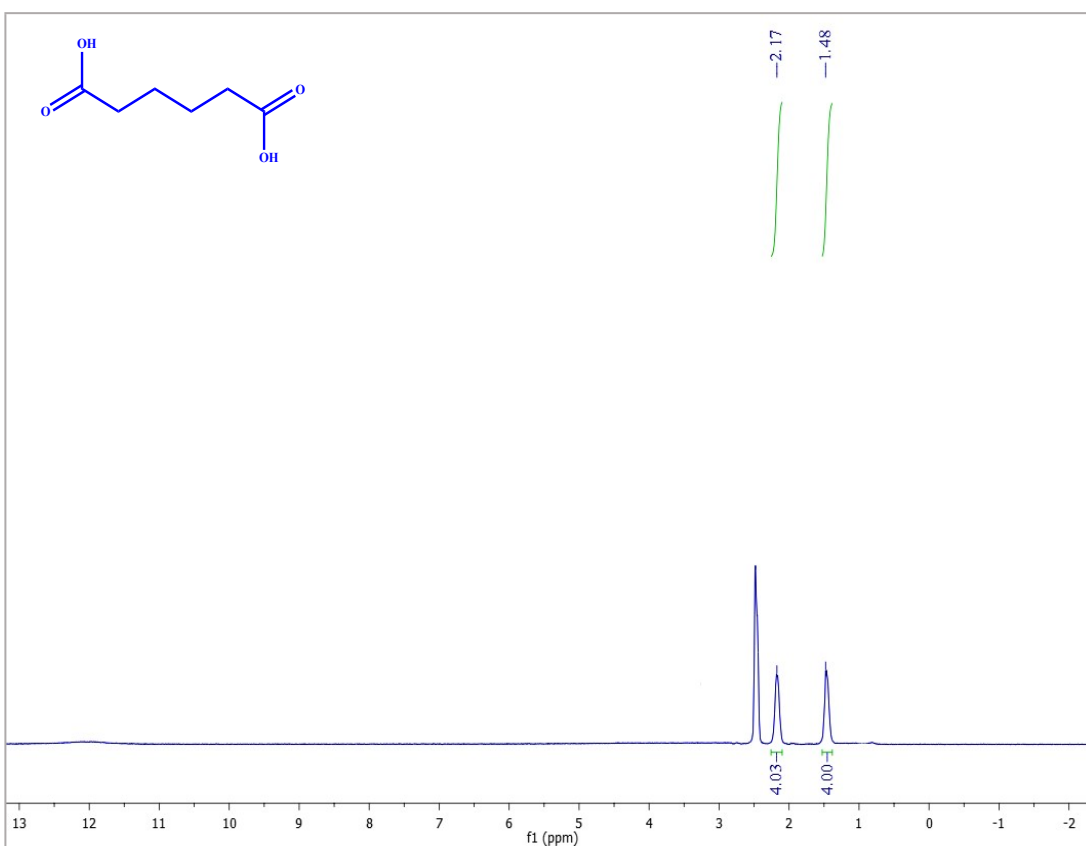

3. 6-Oxoheptanoic acid

$^1\text{H NMR}$  (250 MHz,  $\text{CDCl}_3$ ):  $\delta$  (ppm) = 2.63 (m, 4H), 2.13 (s, 3H), 1.64 (m, 4H).

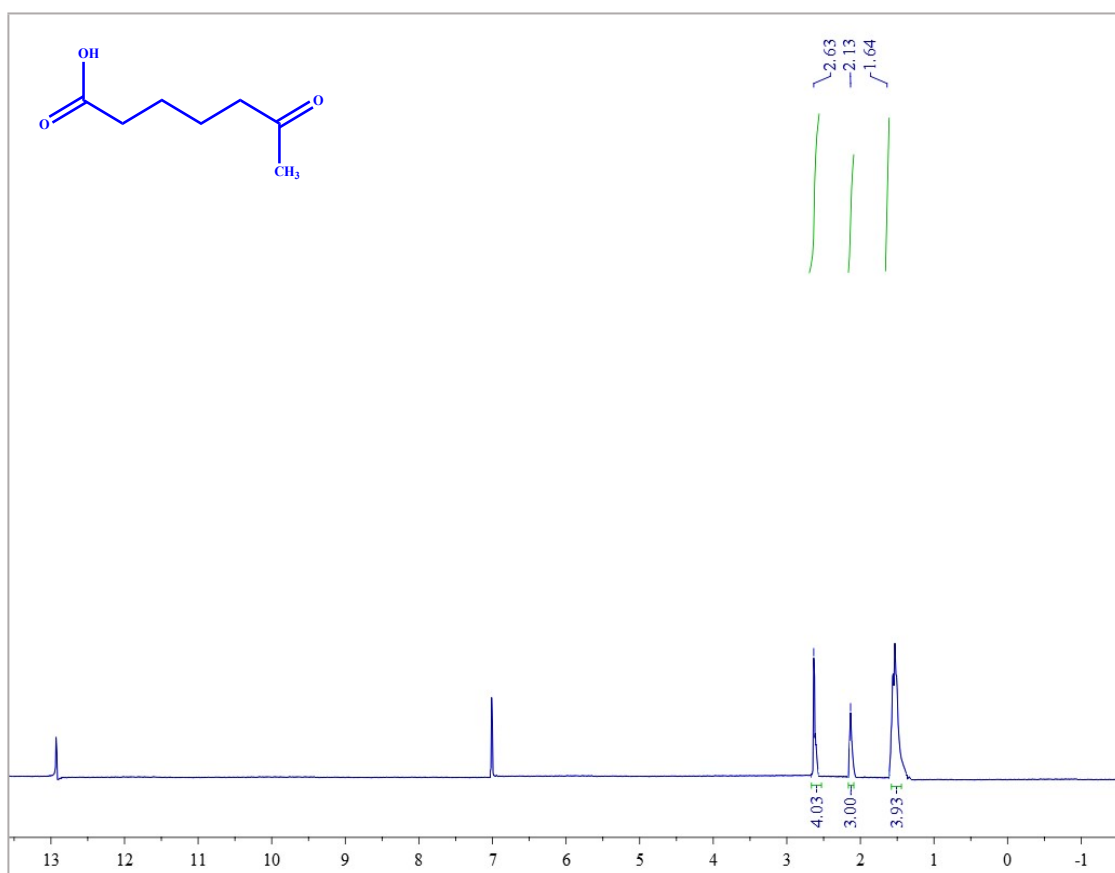

4. Heptanoic acid

$^1\text{H NMR}$  (250 MHz,  $\text{CDCl}_3$ ):  $\delta$  (ppm) = 2.57 (m, 2H), 1.55 (m, 2H), 1.26 (m, 6H), 0.88 (m, 3H).

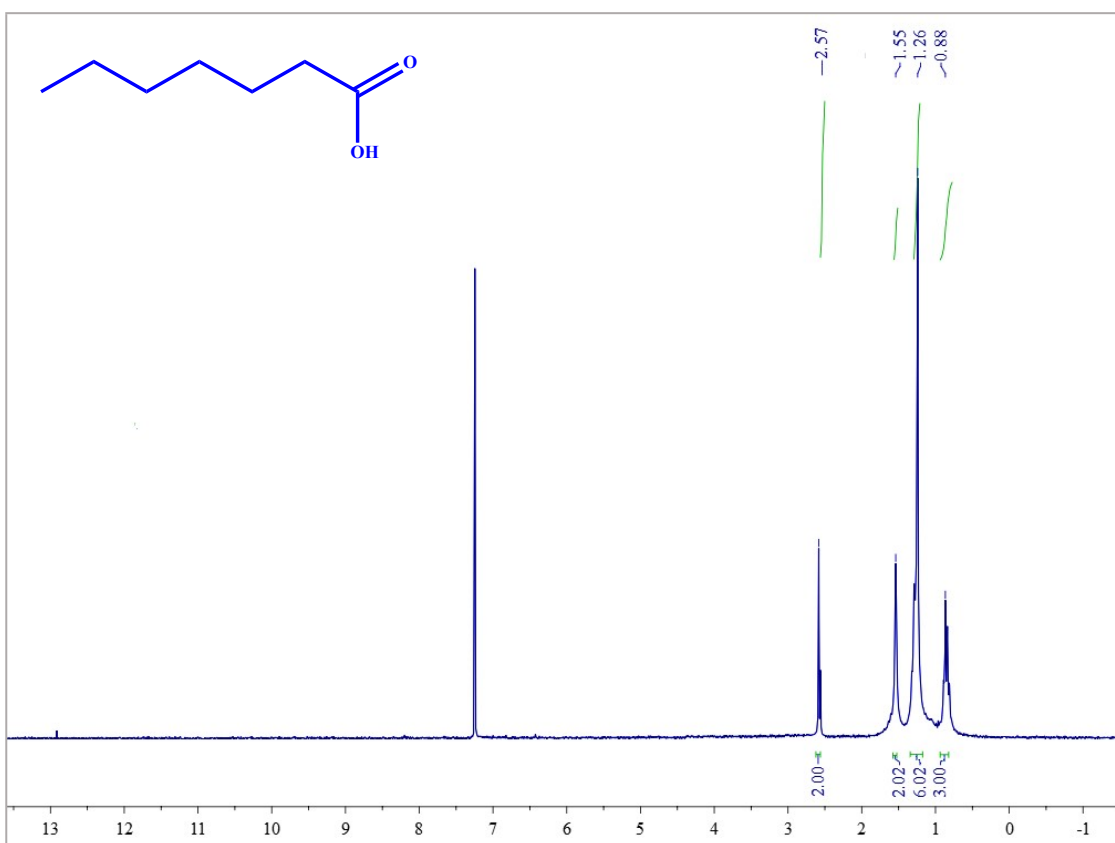

5. Octanedioic acid

$^1\text{H NMR}$  (250 MHz,  $\text{CDCl}_3$ ):  $\delta$  (ppm) = 2.55 (m, 4H), 1.49 (m, 4H), 1.26 (m, 4H).

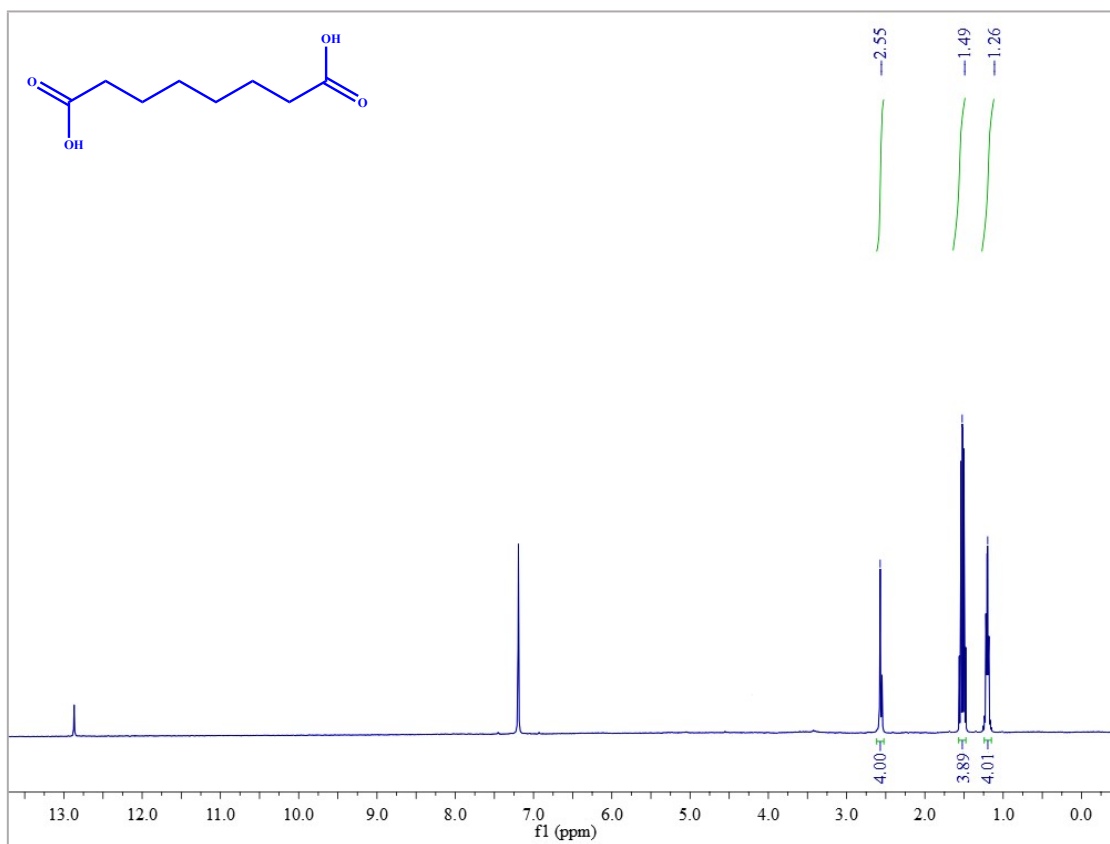

6. 3-Methylbutanoic acid

$^1\text{H NMR}$  (250 MHz,  $\text{CDCl}_3$ ):  $\delta$  (ppm) = 2.31 (m, 3H), 0.81 (m, 6H).

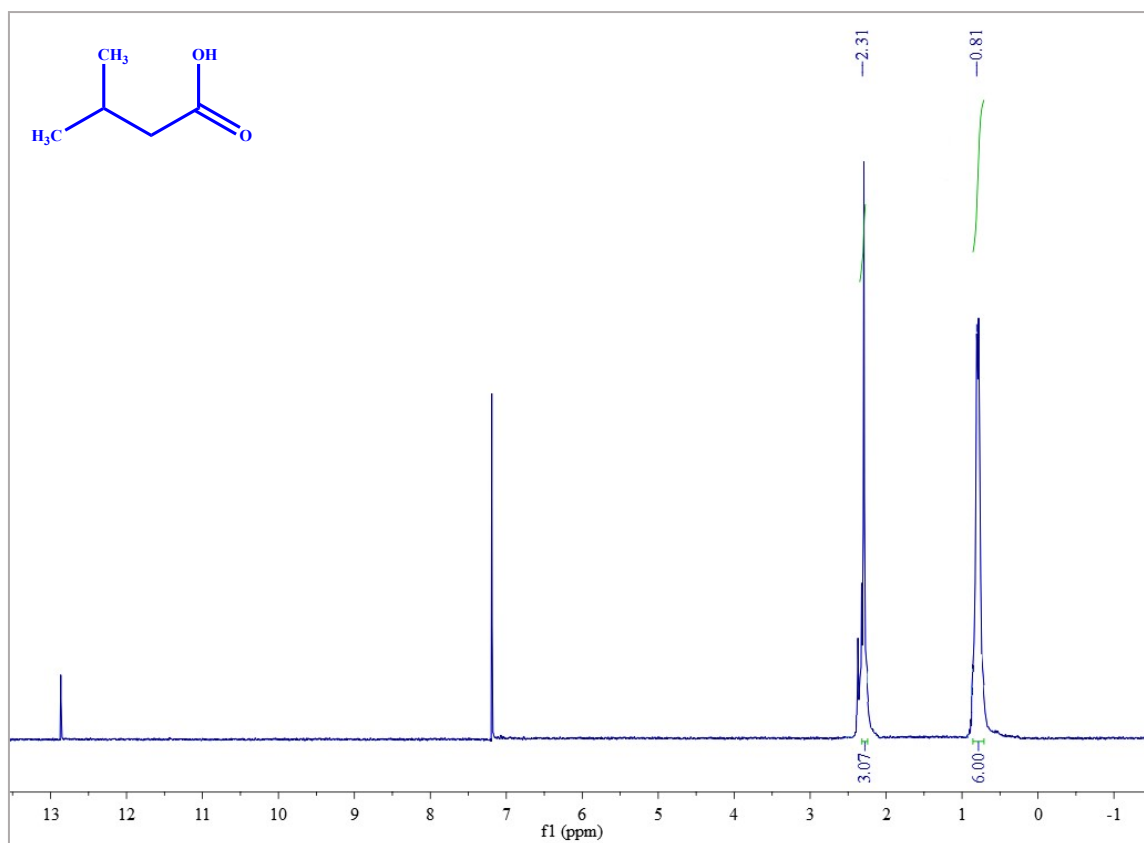

7. Adipic acid

$^1\text{H NMR}$  (250 MHz,  $\text{CDCl}_3$ ):  $\delta$  (ppm) = 2.17 (m, 4H), 1.48 (m, 4H).

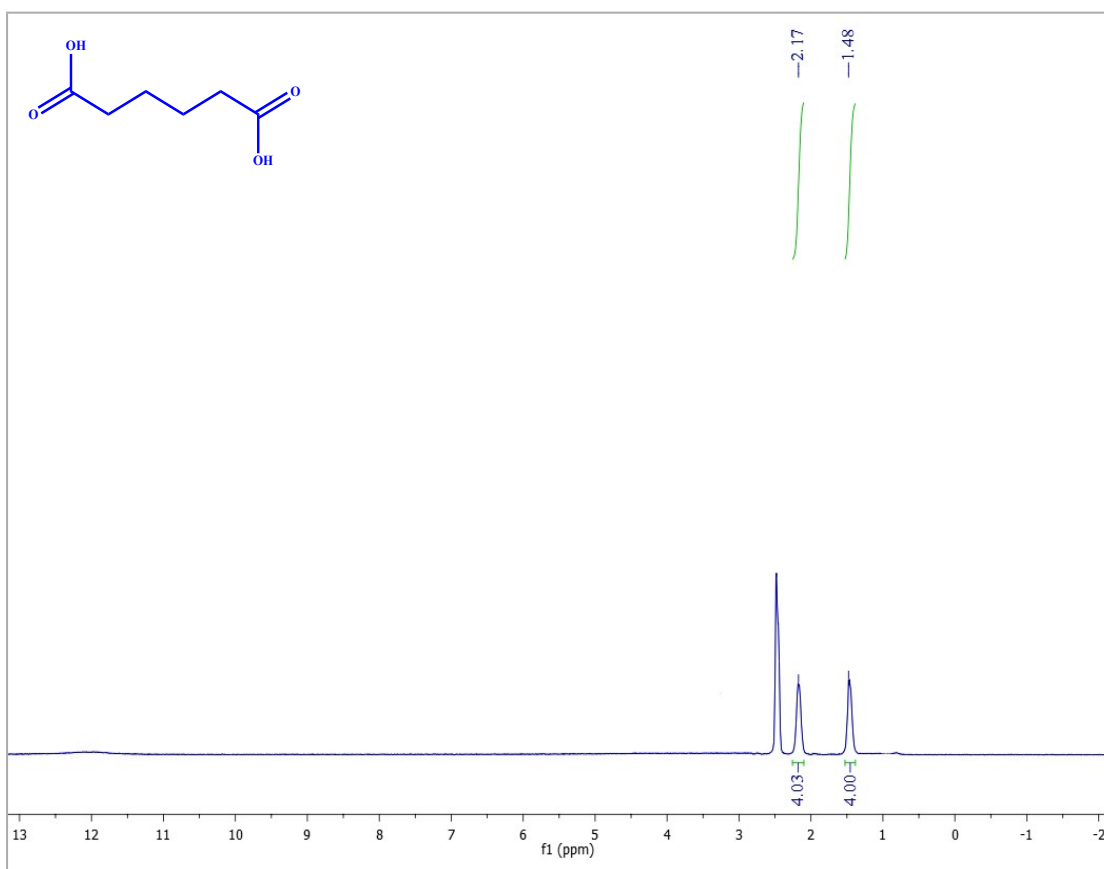

8. Benzoic acid

$^1\text{H NMR}$  (250 MHz,  $\text{CDCl}_3$ ):  $\delta$  (ppm) = 8.1 (d,  $J = 8$  Hz, 2H), 7.62 (t,  $J = 8$  Hz, 1H), 7.48 (t,  $J = 8$  Hz, 2H).

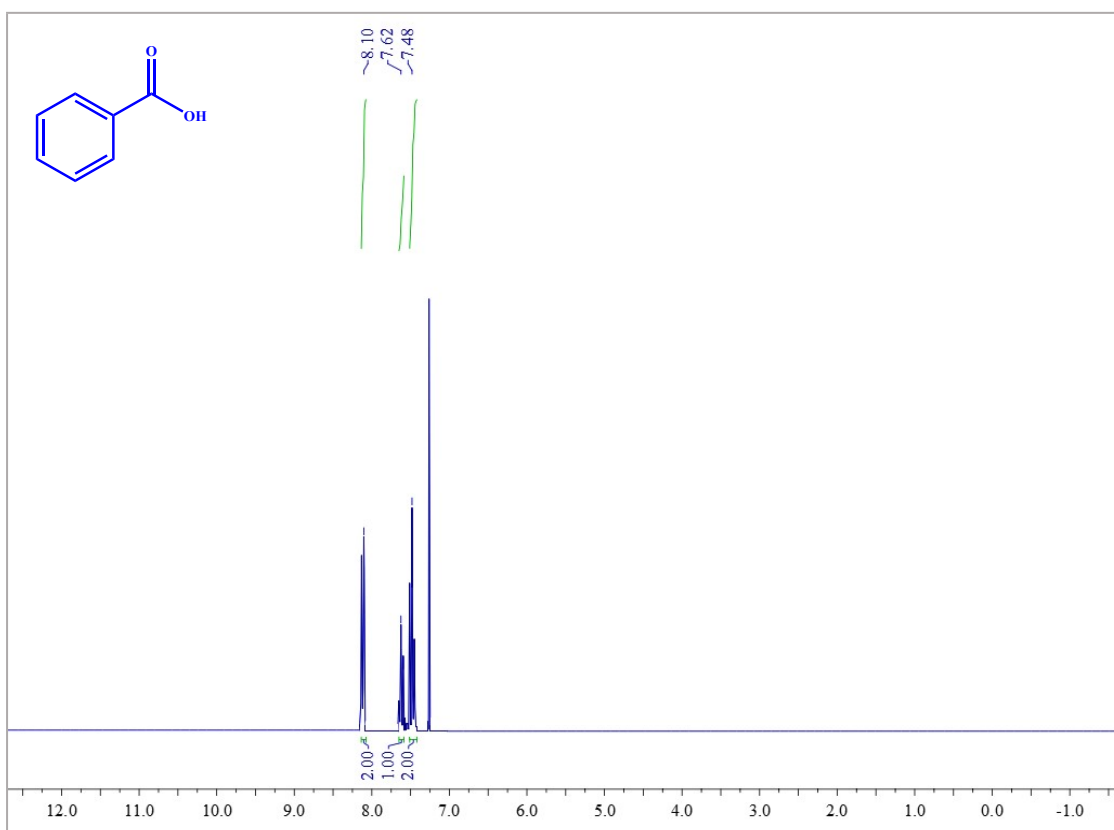

9. Cis-stilben oxide

$^1\text{H NMR}$  (250 MHz,  $\text{CDCl}_3$ ):  $\delta$  (ppm) = 7.45 (m, 10H), 3.94 (s, 2H).

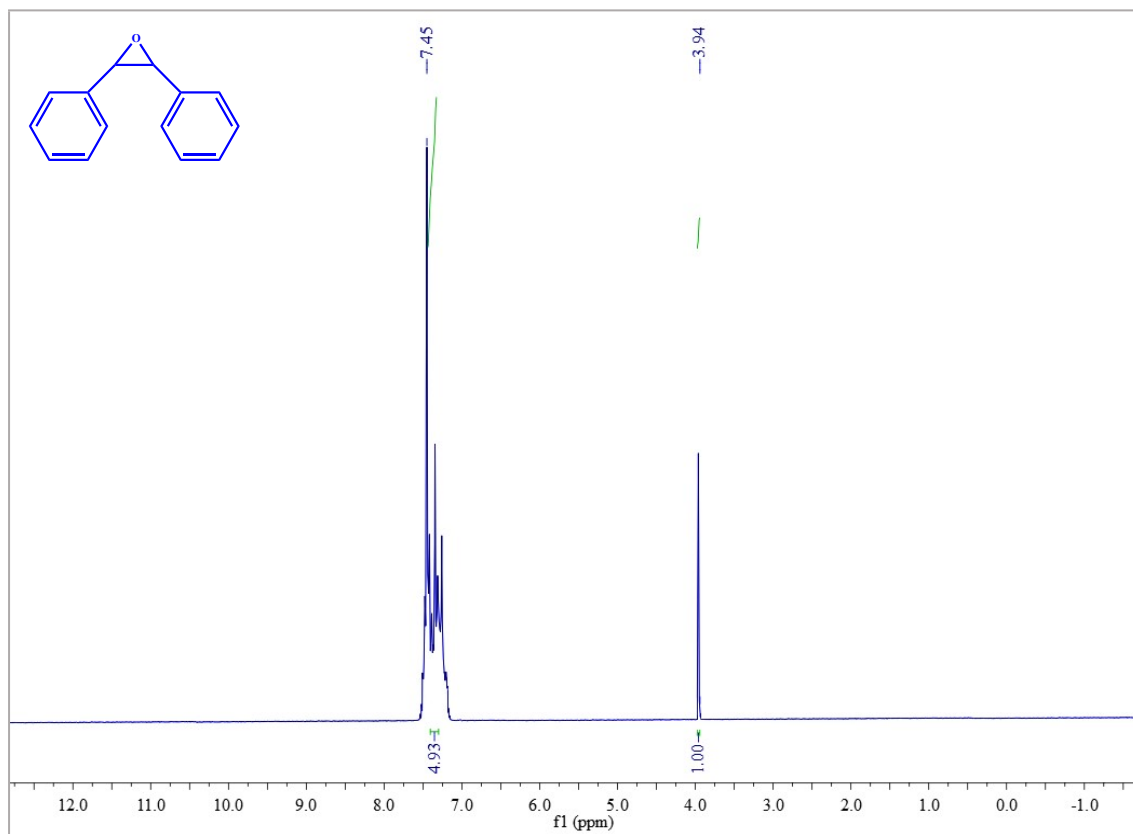

## Benzoxazoles NMR

### 1. 5,7-Di-tert-butyl-2-(4-bromophenyl)benzo[d]oxazole

Refined by column chromatography on silica gel and laundered with ethyl acetate/n-hexane (1:100). Isolated yield: 327 mg, 97%. Pale yellow liquid;  $^1\text{H NMR}$  (250 MHz,  $\text{CDCl}_3$ ):  $\delta$  (ppm) = 1.39 (s, 9H), 1.54 (s, 9H), 7.31 (d,  $J = 2.5$  Hz, 1H), 7.64 (d,  $J = 7.5$  Hz, 2H), 7.68 (d,  $J = 2.5$  Hz, 1H), 8.09 (d,  $J = 7.5$  Hz, 2H).

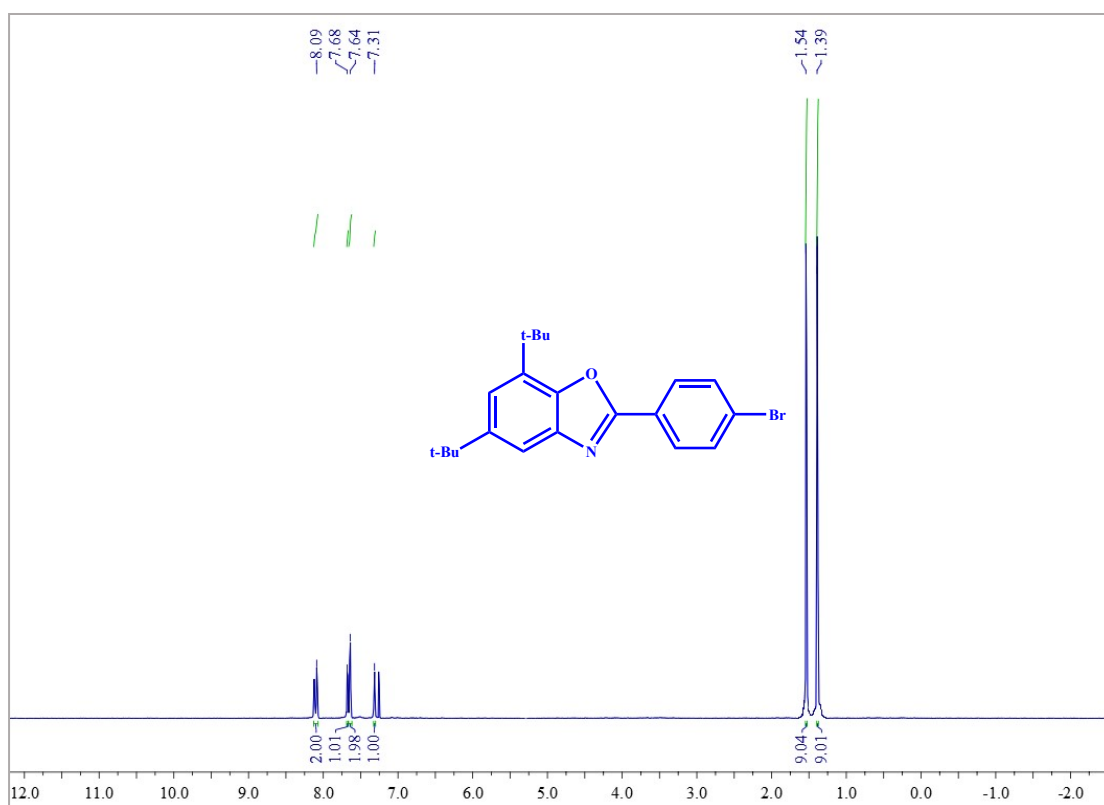

2,5,7-Di-tert-butyl-2-(4-chlorophenyl)benzo[d]oxazole

Refined by column chromatography on silica gel and laundered with ethyl acetate/n-hexane (1:100). Isolated yield: 321 mg, 94%. Colorless liquid;  $^1\text{H NMR}$  (250 MHz,  $\text{CDCl}_3$ ):  $\delta$  (ppm) = 1.41 (s, 9H), 1.49 (s, 9H), 7.31 (d,  $J=2.5$  Hz, 1H), 7.65 (d,  $J=2.5$  Hz, 1H), 7.52 (d,  $J=7.5$  Hz, 2H), 8.16 (d,  $J=7.5$  Hz, 2H).

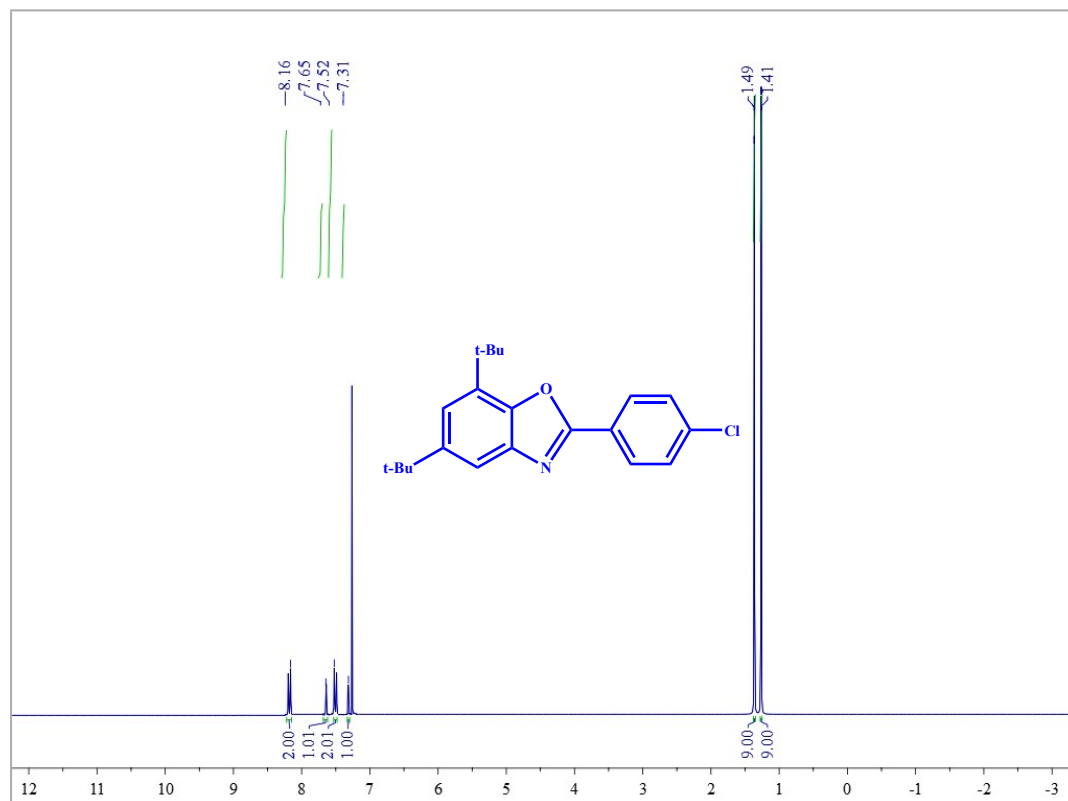

3, 5,7-Di-tert-butyl-2-(2-chlorophenyl)benzo[d]oxazole

Refined by column chromatography on silica gel and laundered with ethyl acetate/n-hexane (1:100). Isolated yield: 321 mg, 92%. Colorless liquid;  $^1\text{H}$  NMR (250 MHz,  $\text{CDCl}_3$ ):  $\delta$  (ppm) = 1.40 (s, 9H), 1.54 (s, 9H), 7.35 (d,  $J=2.5$  Hz, 1H), 7.44 (m, 2H), 7.56 (d,  $J=7.5$  Hz, 1H), 7.72 (d,  $J=2.5$  Hz, 1H), 8.16 (d,  $J=7.5$  Hz, 1H).

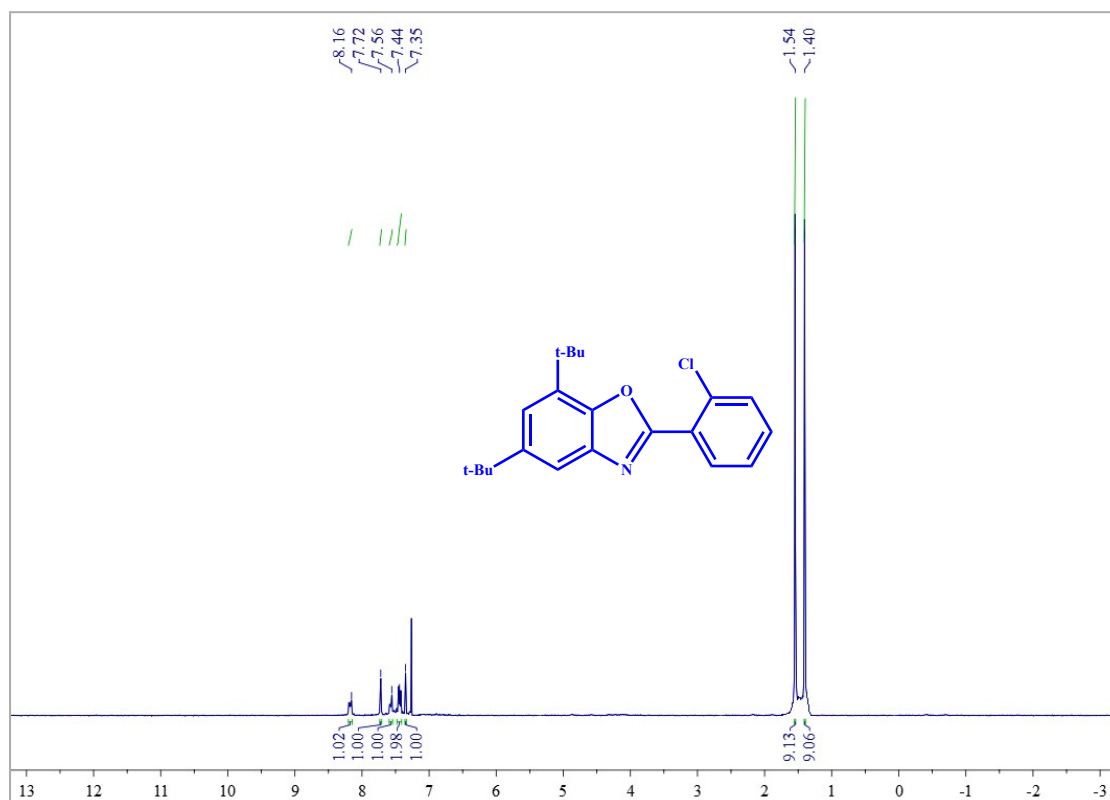



4. 5,7-Di-tert-butyl-2-(2,6-dichlorophenyl)benzo[d]oxazole

Refined by column chromatography on silica gel and laundered with ethyl acetate/n-hexane (1:100). Isolated yield: 330 mg, 90%. Colorless liquid;  $^1\text{H NMR}$  (250 MHz,  $\text{CDCl}_3$ ):  $\delta$  (ppm) = 1.41 (s, 9H), 1.50 (s, 9H), 7.38-7.46 (m, 4H), 7.73 (d,  $J=2.5$  Hz, 1H).

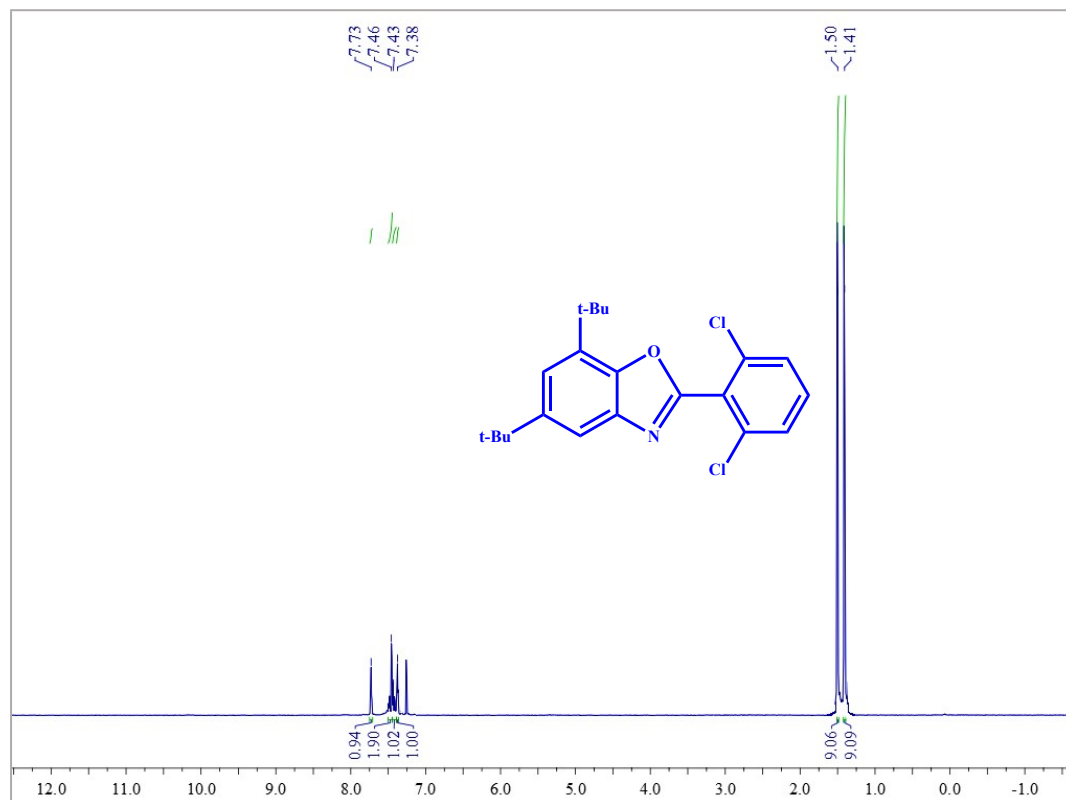

5. 5,7-Di-tert-butyl-2-(4-nitrophenyl)benzo[d]oxazole

Refined by column chromatography on silica gel and laundered with ethyl acetate/n-hexane (1:100). Isolated yield: 287 mg, 88%. Pale yellow liquid;  $^1\text{H NMR}$  (250 MHz,  $\text{CDCl}_3$ ):  $\delta$  (ppm) = 1.41 (s, 9H), 1.49 (s, 9H), 7.21 (d,  $J$  = 2.5 Hz, 1H), 7.23 (d,  $J$  = 2.5 Hz, 1H), 7.91 (d,  $J$  = 7.5 Hz, 2H), 8.31 (d,  $J$  = 7.5 Hz, 2H).

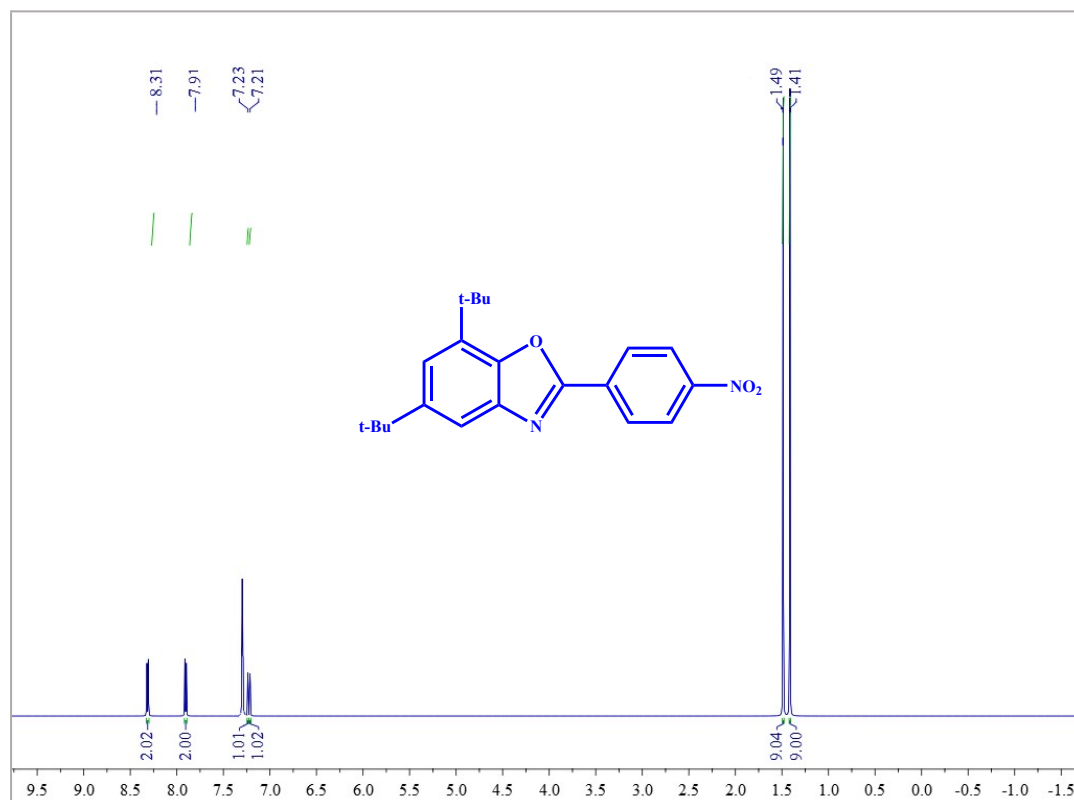

6. 5,7-Di-tert-butyl-2-(p-tolyl)benzo[d]oxazole

Refined by column chromatography on silica gel and laundered with ethyl acetate/n-hexane (1:100). Isolated yield: 293 mg, 80%. Pale yellow liquid;  $^1\text{H NMR}$  (250 MHz,  $\text{CDCl}_3$ ):  $\delta$  (ppm) = 1.41 (s, 9H), 1.49 (s, 9H), 2.45 (s, 3H), 7.29 (d,  $J = 4$  Hz, 1H), 7.32-7.35 (d,  $J = 8$  Hz, 2H), 7.64 (d,  $J = 4$  Hz, 1H), 8.12 (d,  $J = 8$  Hz, 2H).

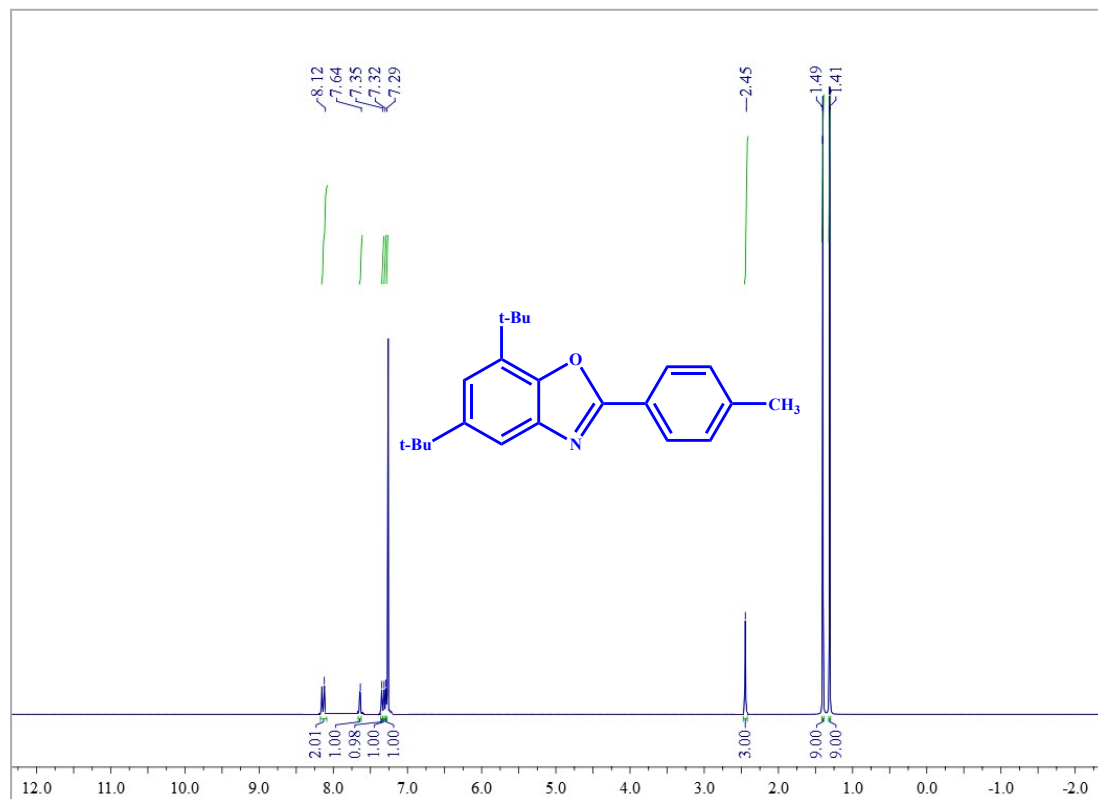

7. 5,7-Di-tert-butyl-2-(4-methoxyphenyl)benzo[d]oxazole

Refined by column chromatography on silica gel and laundered with ethyl acetate/n-hexane (1:100). Isolated yield: 154 mg, 78%. Colorless liquid;  $^1\text{H NMR}$  (250 MHz,  $\text{CDCl}_3$ ):  $\delta$  (ppm) = 1.41 (s, 9H), 1.49 (s, 9H), 3.81 (s, 3H), 7.05 (d,  $J$ = 9 Hz, 2H), 7.17 (s, 1H), 7.21 (s, 1H), 7.63 (d,  $J$ = 9 Hz, 2H).

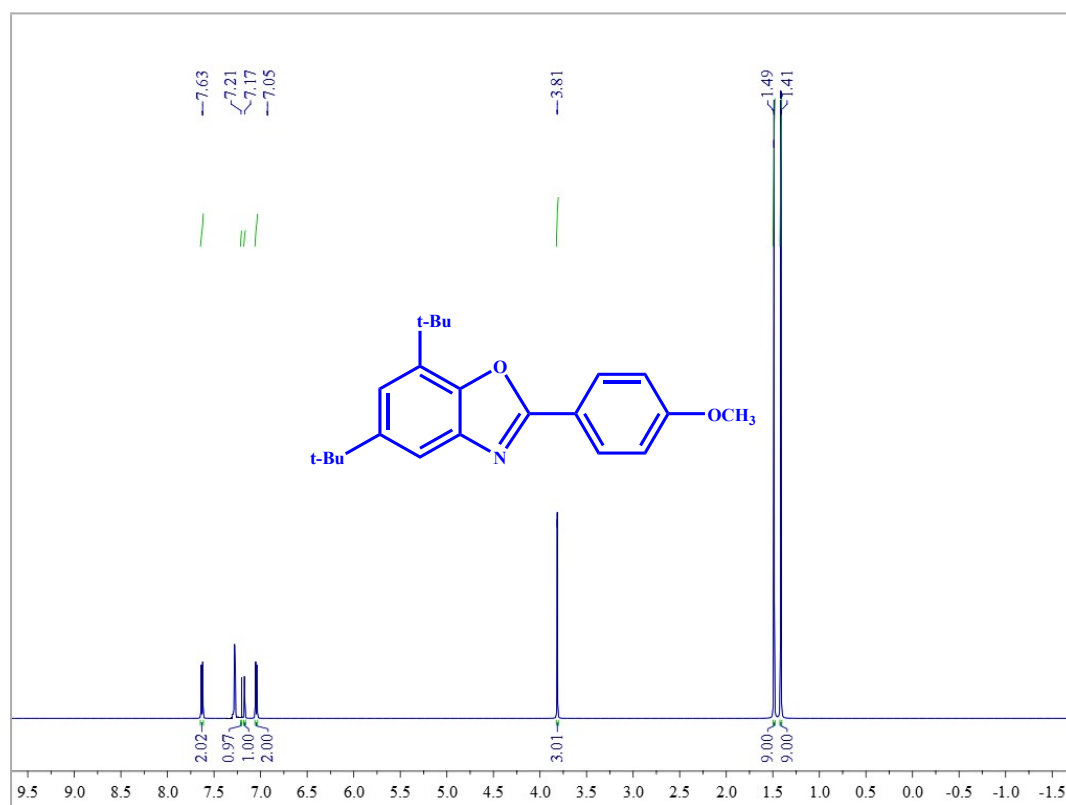

Supplement: d2ra06818d2.pdf [file d2ra06818d2.pdf]
