# Supplementary material for: New iron(iii) complex of bis-bidentate-anchored diacyl resorcinol on a Fe3O4 nanomagnet: C–H bond oxygenation, oxidative cleavage of alkenes and benzoxazole synthesis
Source: Royal Society of Chemistry journal article supplement (doi:10.1039/d2ra06818d), 2023-01-01
Supplement: d2ra06818d1.pdf [file d2ra06818d1.pdf]

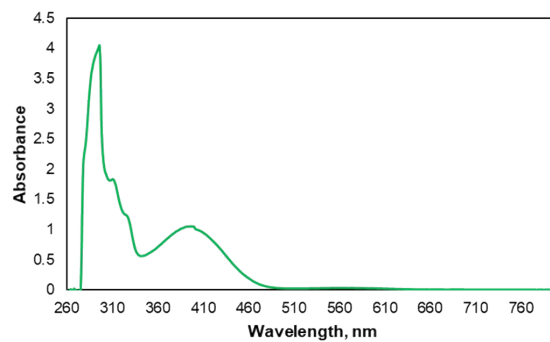

**Fig. S6** UV-Vis spectrum of Fe<sub>3</sub>O<sub>4</sub>@SiO<sub>2</sub>-APTES-Fe<sub>2</sub>L<sup>DAR</sup> in benzoxazole synthesis
